# Plasticity of the binding pocket in peptide transporters underpins promiscuous substrate recognition

Vadim Kotov<sup>1,2,8\*</sup>, Maxime Killer<sup>1,2,3\*</sup>, Katharina E. J. Jungnickel<sup>1,2\*</sup>, Jian Lei<sup>1,2,4\*</sup>, Giada Finocchio<sup>1,2</sup>, Josi Steinke<sup>1,2</sup>, Kim Bartels<sup>1,2</sup>, Jan Strauss<sup>1,2</sup>, Florine Dupeux<sup>5</sup>, Anne-Sophie Humm<sup>5</sup>, Irina Cornaciu<sup>5,9</sup>, José A. Márquez<sup>5</sup>, Els Pardon<sup>6,7</sup>, Jan Steyaert<sup>6,7</sup> and Christian Löw<sup>1,2#</sup>

<sup>1</sup> Centre for Structural Systems Biology (CSSB), Notkestraße 85, 22607 Hamburg, Germany.

<sup>2</sup> European Molecular Biology Laboratory (EMBL) Hamburg, Notkestraße 85, 22607 Hamburg, Germany.

<sup>3</sup> Collaboration for joint PhD degree between EMBL and Heidelberg University, Faculty of Biosciences.

<sup>4</sup> State Key Laboratory of Biotherapy and Cancer Center, Sichuan University, No. 17, Block 3, Southern Renmin Road, Chengdu, Sichuan 610041, People's Republic of China.

<sup>5</sup> European Molecular Biology Laboratory (EMBL) Grenoble, 71 Avenue des Martyrs CS 90181, 38042 Grenoble Cedex 9, France.

<sup>6</sup> Structural Biology Brussels, Vrije Universiteit Brussel (VUB), Brussels 1050, Belgium.

<sup>7</sup> VIB-VUB Center for Structural Biology, VIB, Brussels 1050, Belgium.

<sup>8</sup> Present address: Evotec SE, Essener Bogen 7, 22419 Hamburg, Germany.

<sup>9</sup> Present address: ALPX s.a.s. 71 Avenue des Martyrs, 38000 Grenoble, France.

**\* Authors contributed equally**

**# Corresponding author**

Christian Löw

European Molecular Biology Laboratory Hamburg, Notkestrasse 85, D-22607 Hamburg, Germany.

Phone: +49 40 8998 87570

e-mail: [christian.loew@embl-hamburg.de](mailto:christian.loew@embl-hamburg.de)

Twitter handle: @AllIUNeedIsLoew

## 31 **Summary**

32 Proton-coupled oligopeptide transporters (POTs) are promiscuous transporters of the Major  
33 Facilitator Superfamily, that constitute the main route of entry for a wide range of dietary peptides  
34 and orally administrated peptidomimetic drugs. Given their clinical and pathophysiological  
35 relevance, several bacterial and mammalian POT homologs have been extensively studied on a  
36 structural and molecular level. However, the molecular basis of recognition and transport of the wide  
37 range of peptide substrates has remained elusive. Here we present 14 X-ray structures of the bacterial  
38 POT DtpB in complex with chemically diverse di- and tripeptides, providing novel insights into the  
39 plasticity of the conserved central binding cavity. We analyzed binding affinities for more than 80  
40 peptides and monitored uptake by a fluorescence-based transport assay. To probe if all natural 8400  
41 di- and tripeptides can bind to DtpB, we employed state-of-the-art molecular docking and machine  
42 learning and conclude that peptides of a specific subset with compact hydrophobic residues are the  
43 best DtpB binders.

44

## 45 **Keywords**

46 major facilitator superfamily; SLC15; peptide transporter; macromolecular crystallography;  
47 nanobody; promiscuity; docking; NanoDSF; Rosetta; plasticity

## 48 **Introduction**

49 Living cells have to adapt rapidly to environmental changes to maintain nutrient homeostasis, which  
50 requires the use of different nitrogen-containing nutrients. Hence, cells express a variety of genes to  
51 ensure the scavenging of alternative nitrogen sources such as amino acids or peptides <sup>1</sup>. Peptide  
52 transporters of the major facilitator superfamily (MFS), namely the proton-dependent oligopeptide  
53 transporter (POT) family, provide the cell with valuable nitrogen and carbon sources by mediating  
54 the uptake of di- and tripeptides <sup>2</sup>. POT members are known to have an overall helical arrangement  
55 termed “MFS-fold”, formed by two helical bundles (N- and C-terminal bundle) that are related by a  
56 pseudo-two-fold symmetry <sup>3-8</sup> and function according to the alternate access mechanism <sup>9-13</sup>.  
57 Additionally, they carry specific sequence signature motifs important for proton coupling, ligand  
58 binding, and transport <sup>2,3,14</sup>. They are known to be highly promiscuous, expected to transport almost  
59 all 8400 di- and tripeptides composed of proteinogenic amino acids <sup>2</sup>.

60 In *E. coli*, four members of the POT family were identified and termed di- and tripeptide permease  
61 (Dtp) A to D <sup>15-17</sup>. Experimental structures of DtpA, DtpC and DtpD were reported recently <sup>7,8,18</sup>.  
62 Transport inhibition experiments indicated that the binding sites of DtpA and DtpB interact with a  
63 large number of substrates and peptidomimetic drugs in a similar fashion as the extensively studied  
64 mammalian homolog PepT1 <sup>16,19-24</sup>. DtpC and DtpD, however, were classified as atypical POTs, as  
65 they were shown previously to favour positively charged peptides as substrates <sup>18,22,25-30</sup>.

66 In the last decade, over 50 entries of the POT family were deposited in the Protein Data Bank (PDB),  
67 representing eleven bacterial and two mammalian homologs, bound to eight unique natural di- and  
68 tripeptides (Ala-Phe, Ala-Glu, Ala-Gln, Ala-Leu, Phe-Ala, Phe-Ala-Gln, Ala-Ala-Ala, alafosfalin),  
69 peptidomimetic drugs (valaciclovir, valganciclovir, 5-aminolevulinic acid) and a potent transport  
70 inhibitor Lys[Z(NO<sub>2</sub>)]-Val <sup>3-8,10,18,31-41</sup>. These efforts revealed the basic principle underlying peptide  
71 binding in POTs which can be described as an electrostatic clamping mechanism between the  
72 invariable part of peptides (N- and C- termini as well as the peptide backbone) and conserved residues  
73 in the transporter (mainly via arginine, lysine, glutamate, asparagine and tyrosine residues). In  
74 addition, the molecular changes during transport have been recently described in human PepT1 and  
75 PepT2, providing insights into the dynamics of peptide transporters and the local rearrangements of  
76 the binding site through-out the full transport cycle <sup>31</sup>. However, it still remains unclear how POTs  
77 can recognize and transport such a vast variety of peptides due to the lack of high-resolution structures  
78 of POTs bound to chemically diverse substrates.

79 Here, we determined crystal structures of DtpB complexed with 14 different di- and tripeptides,  
80 providing novel insights into the plasticity of the conserved central binding cavity in response to a

81 wide range of chemically diverse peptides. We thereby also complete the entire family of  
82 experimental POT structures from *E. coli* ranging from DtpA to D. Moreover, we measured binding  
83 affinities for more than 80 peptides using the thermal shift method and employed a fluorescence-  
84 based transport assay to monitor the uptake of peptides into liposomes reconstituted with DtpB. Our  
85 analysis indicates that high affinity peptides are only poorly transported and rather act as inhibitors,  
86 while peptides in the medium affinity range display the highest transport rates. Finally, we employed  
87 state-of-the-art molecular docking and machine learning to probe if all 8400 di- and tripeptides  
88 composed of proteinogenic amino acids can bind to DtpB and conclude that a specific subset of  
89 peptides with compact hydrophobic residues are the best DtpB binders.

90

## 91 **Results and Discussion**

### 92 *Structures of DtpB-peptide complexes stabilized by nanobody 132*

93 In order to obtain highly diffracting crystals of DtpB, we selected conformation-specific nanobodies  
94 after immunizing a noninbred llama<sup>42</sup>. Out of 31 recombinantly expressed and purified nanobodies,  
95 14 bound DtpB with a dissociation constant of 30 nM or lower as evident by bilayer interferometry  
96 (BLI) measurements (Figure 1, Supplementary Figure 1, Supplementary Tables 1 and 2). They were  
97 used as crystallization chaperones in subsequent crystallization trials and nanobody 132 (Nb132)  
98 emerged as the most promising binder for co-crystallization approaches. DtpB-Nb132 was initially  
99 incubated with the tripeptide Ala-Leu-Ala (ALA), and well-diffracting crystals grew using the vapor  
100 diffusion method. The structure of DtpB was determined using the atomic model of DtpA<sup>7</sup> (PDB  
101 accession number 6GS4) as search model for molecular replacement. Strong positive peaks in the  
102 difference electron density map (i.e.  $F_{\text{obs}} - F_{\text{calc}}$ ) indicated the presence of additional electrons/atoms in  
103 the periplasmic region of DtpB, and within the central cavity, allowing modelling of Nb132 and the  
104 tripeptide.

105 DtpB crystallized in an inward facing open (IF open) state. In this conformation the central cavity of  
106 the transporter is open to the cytoplasm and closed to the periplasm (Figure 1). DtpB adopts the  
107 canonical MFS fold, characterized by two six transmembrane helix bundles. The N- and C-terminal  
108 bundles are linked by the HA-HB helices, as observed in other bacterial POTs<sup>3-8,10,18,32-35,37,39</sup>. The  
109 overall structure of DtpB is similar to DtpA, DtpC, and DtpD with  $C_{\alpha}$  atom RMSD (root-mean-square  
110 deviation) values of 0.9, 1.3, and 1.2 Å, respectively. In DtpB, the IF open state is stabilised by  
111 electrostatic interactions between the two bundles i.e., Y31-Y285; G35-Q315; Q49-V440; Y64-

112 Y282; and Y149-E393. Nb132 further stabilizes the closure on the periplasmic side by interacting  
113 with the periplasmic surface of the transporter through polar contacts (Figure 1B).  
114 In order to obtain a broader vision of the plasticity of the binding site in response to peptides  
115 possessing various chemical groups, the co-crystallization efforts were continued with an in-house  
116 library of 82 peptides. Several batches of the DtpB-Nb132 complex were prepared, incubated with a  
117 peptide, and then dispensed robotically in 96 well screens containing three sets of crystallization  
118 conditions. If the diffraction resolution of an obtained crystal was better than 4 Å, the chemical  
119 screens were further refined around the best conditions. In this campaign, X-ray diffraction data were  
120 collected and analyzed for more than 2000 crystals with the help of automated crystallography  
121 pipelines based on the CrystalDirect technology<sup>43,44</sup>. For each dataset, with a resolution limit higher  
122 than 3.5 Å, the presence or absence of a peptide was initially assessed by using an atomic model of  
123 DtpB devoid of any substrate, to calculate a difference electron density map (i.e.,  $F_{\text{obs}} - F_{\text{calc}}$ ). There,  
124 strong positive peaks within the central cavity indicated the presence of a ligand. The co-crystallized  
125 peptide was then modeled inside the positive peak, as a di- or trialanine moiety first, and then mutated  
126 to its original sequence, as the signal improved during the refinement steps. In the final validation,  
127 OMIT maps excluding the modeled ligands, were calculated for each structure (Supplementary Figure  
128 2). In summary, we obtained 14 unique peptide bound datasets in a resolution range between 2.0 and  
129 2.8 Å with the following peptides: Ala-Phe (AF), Ala-Ile (AI), Ala-Leu (AL), Ala-Gln (AQ), Ala-Val  
130 (AV), Ala-Trp (AW), Lys-Val (KV), Met-Ser (MS), Asn-Val (NV), Ser-Leu (SL), Ala-Leu-Ala (ALA),  
131 Ala-Phe-Ala (AFA), Ala-Pro-Phe (APF) and Ala-Trp-Ala (AWA) (Figure 2, Supplementary Figure 3,  
132 Table 1). This represents a large portfolio of di- and tripeptides for POTs compared to the present  
133 literature data. These structures now allowed us to analyze changes and local rearrangements in the  
134 binding site of DtpB and shed light on how promiscuity is achieved in this transporter family.

### 136 *Plasticity in the peptide binding pocket to accommodate diverse peptides*

137 All DtpB complexes crystallized in the same space group with very similar cell dimensions (Table  
138 1). A superposition of the structures highlights that the N-termini of all di- and tripeptides are  
139 anchored in a similar manner (Figure 2). The primary amine is steadily hooked by N153, N318, and  
140 E393 of DtpB. This triad of residues remains fixed in all structures, and is conserved in all  
141 prototypical POTs, with the exception of the peptide-histidine transporter 1 (PHT1), where N318 is  
142 replaced by an aspartate. Additional residues of the binding site form a pocket around the N-terminal  
143 residue of the substrate (Supplementary Figures 3 and 4). These include Y31, Q34, S156, S156, L160,  
144 M288, and P319. Together with the conserved N153, N318, E393 triad, they constitute the so-called  
145 P1 pocket. The chemical diversity of N-terminal residues in the co-crystallized tripeptide data sets

146 was poor (only alanine residues), but richer for dipeptides (i.e., alanine, lysine, serine, methionine,  
147 asparagine). P1 does not undergo conformational changes in presence of these various residues,  
148 however, polar interactions stabilize certain substrates (Supplementary Figure 3, Figure 2). Notably,  
149 Q34 interacts with the  $\epsilon$ -amino group of K1\* in KV; N318 with the thioester group of M1\* in MS;  
150 S156 and N318 with the hydroxymethyl group of S1\* in SL; and S156, and N318 with the  
151 carboxamide group of N1\* in NV. The C-terminus of dipeptides adopted a constant position,  
152 stabilized by R27 and occasionally by K123 as well.

153 The picture is different for the second residue of the substrate. To adapt the central binding cavity to  
154 the different sizes of side chains carried by the C-terminal residues of dipeptides (P2 pocket), two  
155 rotamer conformations of Y64 and Q424 are possible (Supplementary Figure 5). They control the  
156 volume of the ‘upper region’ of the P2 pocket. For instance, in presence of the small dipeptide AV,  
157 the upper region of P2 is tightened by the conformation of Y64 and Q424, while it is widened in the  
158 presence of the bulky dipeptide AW (Supplementary Figure 5). Additional residues such as Y285 and  
159 F428 further fine-tune the upper region of P2. Of note, Y285 and Y64 delimit the P2 pocket from the  
160 P1 and P3 pockets respectively (Figure 2). Unlike other side-chains fitting in P2, the indole moiety  
161 of W2\* in the tripeptide AWA extends further down, towards the cytosolic side of the C-bundle  
162 (Supplementary Figure 5). This ‘lower region’ of P2 (i.e. L401, W420, and F421) is more flexible,  
163 and closes up to stabilize W2\*. Polar interactions also occur between P2 and the peptides. Y282  
164 stabilizes the indole ring of W2\* in AWA as well as the carboxamide group of Q2\* in AQ  
165 (Supplementary Figure 3 F,J). In addition, the hydrophobic side chains in the second position (i.e. in  
166 the peptides AV, AL, AI, AF, AW, ALA, AFA, AWA) are increasingly stabilized as a function of their  
167 size, and through contraction of the upper region of P2.

168 The backbone coordination of tripeptides withstands different torsion angles around amide bonds.  
169 Since the primary amine of the N-terminus remains hooked in place between N153, N318, and E393,  
170 the carboxylic group of the C-terminus is subsequently shifted or rotated, resulting in different poses  
171 (Supplementary Figure 3, Figure 2). For instance, the carboxylic group of AWA coincides with the  
172 ones of dipeptides. This co-localization is achieved by a kinked backbone geometry of the tripeptide.  
173 AFA and ALA are not kinked, but stretched. In comparison, in dipeptides AL and AF a conformational  
174 change in K123 creates sufficient space for the carboxylic group of L2\* and A3\*, to fit in a position  
175 preserving the stabilizing salt bridges with R27 and K123 (Supplementary Figures 3 and 6). Finally,  
176 in the case of the tripeptide APF, the proline residue restrains the backbone and evicts the C-terminus  
177 from the positively charged patch formed by R27 and K123, and the bulky phenyl group of F3\*  
178 extends towards the cytosolic side of the N-bundle, in P3 (Supplementary Figures 3 and 6). The  
179 overall plasticity of the binding site of DtpB is illustrated in Movie 1.

180 In summary, the N153, N318, E393 triad is a common anchor point of peptides N-termini, in  
181 agreement with earlier literature<sup>32,45,46</sup>. We find that the C-termini of peptides are often stabilized by  
182 R27 and K123, but the latter is not mandatory, contrary to the previously suggested model<sup>14</sup>. Recent  
183 molecular dynamics (MD) studies using human PepT2 and the tripeptide AAA<sup>36</sup> support this  
184 observation and suggest that peptides engage with the binding pocket via A1\* first, before being  
185 tightly locked in place by the triad (N192, N348, E622 in human PepT2). The simulations also  
186 indicate that R27 and K64 later contribute to further stabilization of the C-terminus. Importantly, K64  
187 (Q34 in DtpB) was not essential in DtpB to coordinate the tripeptide APF and K64 is generally not  
188 conserved among POT homologs. It is likely that the presence of bulky side chains in the N-terminal  
189 position, would cause local changes in P1, but we did not succeed in determining structures of such  
190 complexes. The versatility of P2 was previously described with rearrangements of Y68 and W427 in  
191 a POT from *Streptococcus thermophilus* (PepT<sub>St</sub>)<sup>32,33</sup>, which correspond to Y64 and W420 in DtpB.  
192 Here, these two residues critically contribute to adapt P2 to the various co-crystallized peptides, but  
193 other residues (Y282, Y285, L401, Q424, F428) are also involved. Except for the different rotamer  
194 conformations of K123 to enable various positions of tripeptides, the P3 pocket was rather stable  
195 compared to P2. Although these observations indicate that the plasticity of POTs originates mainly in  
196 the P2 pocket, many more combinations of peptides are able to bind to and be transported by DtpB  
197 and other prototypical POTs. Besides, not all residues involved in ligand promiscuity are conserved  
198 in POTs. This could explain the differences of substrate affinities between homologs reported in the  
199 literature.

## 200 201 *Determination of peptide affinities using a thermal unfolding assay*

202 To shed further light on the interactions of different di- and tripeptides with DtpB and determine  
203 binding affinities for a large set of peptides, we employed a thermal unfolding assay. This approach  
204 is commonly used to characterize the stability of proteins and their functional interactions<sup>47-50</sup>. In  
205 particular, the stability of proteins (as judged by the melting temperature  $T_m$ ) increases in a  
206 concentration-dependent manner when a ligand is added (Figure 3A). Various concepts were  
207 proposed to obtain a ligand dissociation constant ( $K_D$ ) based on the ligand-induced shifts of  $T_m$ <sup>51,52</sup>.  
208 These approaches typically assume classic thermodynamic behavior of proteins during unfolding, i.e.  
209 the equilibrium is quickly reached at all temperatures, and protein unfolding is fully reversible. The  
210 latter is rarely observed in practice, so a kinetic description of the unfolding process should be used  
211 instead<sup>53,54</sup>. Recently Hall introduced and validated a kinetic model to determine affinities from  
212 thermal shifts (Figure 3B)<sup>55</sup>. We modified Hall's model to take advantage of modern non-linear curve

213 fitting methods (see Materials & Methods) and applied it to DtpB titrated with di- and tripeptides.  
214 Titration curves could be fit with high confidence for peptides in a broad affinity range (Figure 3C).  
215 The resulting  $K_D$  was not strongly affected by assay conditions <sup>56</sup> (Supplementary Figure 7A).  
216 Importantly, our approach allows us to predict  $K_D$  of new peptides obtained from  $T_m$  measurements  
217 at a single concentration (see Materials & Methods, Supplementary Figure 7B). The rank order of the  
218  $K_D$  agreed well with an orthogonal technique (microscale thermophoresis (=MST), Supplementary  
219 Figure 7C). With this approach we could efficiently measure  $K_D$  values for 82 di- and tripeptides  
220 (Figure 3D) to DtpB and cover a broad region of the peptide chemical space. As expected, determined  
221 affinities span several orders of magnitude, with the tightest binders showing affinities in the low  $\mu\text{M}$   
222 range while others interacted with DtpB only poorly or not at all.

223

### 224 *Tight peptide binding is not associated with transport*

225 The core biological function of a transporter is its ability to move molecules across the lipid bilayer.  
226 To gain more detailed insights into the uptake of various peptides via DtpB, we established a robust  
227 transport assay in liposomes, termed ‘pyranine assay’. Since the peptide uptake by POTs is coupled  
228 to protons <sup>57-59</sup> we used the pH sensitive fluorescent dye pyranine <sup>60</sup> to indirectly monitor peptide  
229 transport into DtpB-containing liposomes. Such an approach was recently applied to characterize the  
230 bacterial POT PepT<sub>St</sub> <sup>61</sup>. We utilized similar experimental conditions to follow transport activity of  
231 DtpB reconstituted into liposomes (Figure 4A). To validate the assay, we initially confirmed transport  
232 of the known POT substrates Ala-Ala (AA) and Gly-Gly (GG) by DtpB (Figure 4B) and related  
233 transporter PepT<sub>St</sub> <sup>16,61</sup> (data not shown).

234 To account for batch-to-batch variations between different liposome reconstitutions, we developed a  
235 non-linear curve fitting procedure to quantify the obtained transport curves in this assay (see Materials  
236 & Methods). In brief, the experimental data were corrected for the empty liposome signal and then  
237 fit to a single exponential decay function to obtain the time constant  $\tau$  (tau) and the amplitude of the  
238 transport curve. The ratio of the amplitude to  $\tau$  corresponds to the initial transport rate at time-point  
239  $t_0$  (slope( $t_0$ )), corresponding to the time of the addition of valinomycin (Figure 4B). Transport  
240 measurements of the substrate AA and buffer alone served as a positive and a negative control and  
241 were used to normalize slope( $t_0$ ) for all measured peptides to range from 0 to 1 thus obtaining  
242 slope( $t_0$ )<sub>rel</sub>. Quantification of transport rates at varying substrate concentrations allowed us to  
243 determine the apparent Michaelis-Menten constants ( $K_M$ ) for the dipeptides AA ( $0.29 \pm 0.04$  mM)  
244 and GG ( $2.63 \pm 0.65$  mM (Supplementary Figure 8A). These values are within the expected range for  
245 POTs <sup>10,40</sup>. In addition, we used surface electrogenic event reader (SURFE<sup>2</sup>R) <sup>62</sup> as an orthogonal



246 technique to verify the uptake of GG and AA by DtpB. In this assay an electrochemical gradient is  
247 absent, and the transport of peptides is driven by an excess of substrate in the external buffer. With  
248 this, we could confirm that AA and GG are transported by DtpB, however, the apparent  $K_M$  values  
249 were 20-30 fold higher compared to the electrochemical gradient driven conditions as used in the  
250 pyranine assay (Supplementary Figure 8).

251 Next, we determined  $\text{slope}(t_0)_{\text{rel}}$  for 24 di- and tri-peptides using the pyranine assay, covering a broad  
252 spectrum of binding affinities as determined by thermal unfolding (Figure 4C,D). In the context of  
253 available  $K_D$  values,  $\text{slope}(t_0)_{\text{rel}}$  forms a bell-shaped distribution (Figure 4D). Peptides that poorly  
254 bound to DtpB or not at all in our thermal shift assay exhibited low or no transport. This indicates  
255 that peptides with very low binding affinities would not initiate the transport cycle since they do not  
256 reside long or well enough bound in the binding site for any conformational changes of the transporter  
257 to occur. Alternatively, the correlation of low binding affinities and no apparent transport might also  
258 result from clashes or unfavoured positioning of the peptide in the binding site. The highest  
259  $\text{slope}(t_0)_{\text{rel}}$ , i.e. peptides with at least 20% of the AA transport rate, could be observed for peptides  
260 with  $K_D$  values in the range of  $\sim 100 \mu\text{M}$  to  $\sim 2.5 \text{ mM}$ . To confirm this observation, we measured  
261 transport for three more peptides picked from this affinity range: AH ( $K_D = 0.10 \pm 0.04 \text{ mM}$ ), MT  
262 ( $K_D = 0.57 \pm 0.07 \text{ mM}$ ) and AK ( $K_D = 1.77 \pm 0.09 \text{ mM}$ ) (Figure 4D, red dots). Of those, only MT  
263 was transported suggesting that a  $K_D$  in a specific range is required, but not the only determining  
264 factor to enable transport by DtpB.

265 Our findings demonstrate that tightly bound peptides are either transported very slowly or act as  
266 inhibitors of transport. Interestingly, previous characterization of PepT<sub>St</sub> using the pyranine assay<sup>61</sup>  
267 demonstrated transport of peptides AF and ALA, which are not transported by DtpB. To confirm the  
268 transport inhibitory effects of tightly binding peptides, we measured uptake of AA in presence of  
269 increasing concentrations of the high affinity binder AF (Figure 4E). The obtained  $IC_{50}$  value for AF  
270 is  $2.37 \pm 0.68 \text{ mM}$ , which corresponds to an inhibitory constant  $K_i$  of  $0.25 \pm 0.08 \text{ mM}$ . The  $IC_{50}$  value  
271 is two orders higher than the previously reported  $IC_{50}$  of  $\sim 0.027 \text{ mM}$  for competition between  
272 radiolabeled AA and AF for PepT<sub>St</sub><sup>10</sup>. This difference can be attributed to the different peptide  
273 concentrations used in the assay (2.5 mM of AA used in this work versus radiolabeled AA used at  
274 0.03 mM concentration<sup>10</sup>). We note that with our assay setup we did not aim to determine the number  
275 of protons being transported along with each peptide, though it was previously shown for PepT<sub>St</sub> that  
276 this number may vary between di- and tripeptides<sup>61</sup>. Consequently, the amplitude of the signal in the  
277 pyranine assay will be higher for peptides that carry more protons, while the time constant  $\tau$  is not  
278 affected.

## 279 *DtpB preferentially binds small hydrophobic peptides*

280 A more detailed analysis of the peptide  $K_D$  dataset (Figure 3G) indicates that DtpB preferentially  
281 binds peptides that are hydrophobic with a molecular weight below 300 Da (Supplementary Figure  
282 9A). Since our dataset accounts for less than 1% of all possible di- and tripeptides made from  
283 proteinogenic amino acids ( $n = 8400$ ), we asked whether the available crystal structures of DtpB-  
284 peptide complexes can be used to formulate more precise peptide recognition rules. For this, we  
285 performed flexible docking all of possible di- and tripeptides into DtpB by the Rosetta FlexPepDock  
286 protocol<sup>63</sup> and used a modified hit selection procedure (see Materials & Methods). This allowed us  
287 to predict the placement of the peptide inside DtpB for all 8400 di- and tripeptides (Figure 5A,  
288 Supplementary Figure 10).

289 The Rosetta energy function is expressed in energy units (kcal/mol) and was recently calibrated to  
290 reliably represent real energies observed in protein molecules<sup>64</sup>. On the other hand, it is impossible  
291 to account for all contributing factors that influence ligand binding without a thorough MD  
292 simulation. Thus, the scores reported by Rosetta or other docking applications generally show low or  
293 no correlation with experimentally observed affinity<sup>65,66</sup>. Indeed, the rank order correlation  
294 (Spearman  $\rho$ ) between the Rosetta score for docked peptides and their experimentally measured  $K_D$   
295 was only -0.28 (data not shown). Therefore, we performed multiple linear regression by using  
296 individual Rosetta energy terms (e.g. electrostatic interactions, optimal placement of rotamers<sup>64</sup>) as  
297 independent variables (features) and negative decimal logarithm of  $K_D$  as the dependent variable. The  
298 obtained models performed poorly in cross-validation (CV) tests with coefficient of determination  
299 ( $R^2$  score) close to 0 or negative (data not shown). Finally, we separated the di- and tripeptides with  
300 experimentally determined  $K_D$  into two classes: binders ( $K_D \leq 1$  mM) and non-binders ( $K_D > 1$  mM)  
301 and trained a logistic regression classifier to distinguish these classes based on Rosetta energy terms  
302 (Figure 5B). Average area under curve (AUC) of the receiver-operator characteristic (ROC) during  
303 CV of this classifier was  $0.67 \pm 0.04$  (see Materials & Methods), suggesting that it outperforms  
304 random classification (AUC 0.5). AUC of the classifier trained with full data was 0.88. The particular  
305 value of logistic regression is that it provides a probability estimate<sup>67</sup> for each sample to belong to  
306 each class (termed ‘binder probability’ in this work). If the peptide’s predicted binder probability is  
307 less than 0.4, then it is very likely to have an experimental  $K_D$  value above 1 mM (Figure 5B). On the  
308 other hand, several peptides with binder probability above 0.6 (AE, LA, LGG, LYA, MAS, RF) still  
309 may be poor binders when tested experimentally. This can be attributed to the fact that the solvent  
310 interaction is not modeled, which for instance plays an important role in peptide recognition by  
311 periplasmic binding proteins OppA<sup>68</sup> and DppA<sup>69</sup>. Furthermore, ‘structural snapshots’ (as opposed  
312 to an MD simulation) are fundamentally limited in capturing the entropic component of binding<sup>62</sup>.

313 Still, the proposed classification approach allows us to exclude obvious non-binders (binder  
314 probability below 0.4) which constitute 4192 out of 8400 peptides (Supplementary Figure 9B). Only  
315 727 peptides have binder probability over 0.99, i.e. in the search of new peptide binders to DtpB it is  
316 sufficient to experimentally check  $\sim 9\%$  of all possible di- and tripeptides.

317 Next, we used the binder probability as a proxy to explore the peptide recognition landscape of DtpB  
318 (Figure 5C,D, Supplementary Figure 11). We observe critical importance of the first position in  
319 binding for both di- and tripeptides (Figure 5C, Supplementary Figure 11). In particular, polar amino  
320 acids but also bulky hydrophobic amino acids tend to decrease the binder probability (Figure 5C,  
321 Supplementary Figure 11). Our docking results also support the observation that DtpB preferentially  
322 binds hydrophobic peptides (Figure 5D), in agreement with previous data and an earlier study of the  
323 yeast homolog Ptr2p<sup>70</sup> and MD-based predictions for PepT<sub>St</sub><sup>71</sup>. Interestingly, our analysis also  
324 reveals that tripeptide binders predominantly contain hydrophobic residues in position 2, whereas  
325 dipeptide binders may also contain hydrophilic residues in position 2 (Figure 5D).

326

### 327 *Prediction and validation of peptide pose and binding for DtpB*

328 To make use of the above described assays and tools, we hypothesize that the combination of  
329 computational docking prediction tools and experiments can be integrated in a workflow to accelerate  
330 the identification of DtpB substrates (Figure 6A). Firstly, the computed docking poses can be used to  
331 estimate the binder probability for all possible di- and tripeptides. Secondly, top hits are validated  
332 with thermal unfolding assays to determine the binding affinity, which can be performed  
333 experimentally on a medium to high-throughput level. Lastly, the peptides that exhibit intermediate  
334 binding affinity (see the bell-shaped dependence of transport rate vs  $K_D$  in Figure 4D) are analyzed  
335 for uptake by a low-throughput transport assay.

336 The obtained docking model (see DtpB preferentially binds small hydrophobic peptides) was  
337 developed with the input of twelve experimental structures of DtpB bound to various peptides  
338 determined in this study. The datasets of DtpB bound to dipeptides AL and NV have not been part of  
339 the training set and as such can be used to validate the predicted binding poses. RMSD values of the  
340 peptide backbone between the experimental structures and the top ten docking poses (rmsBB\_offset  
341 see Materials & Methods) were  $0.61 \pm 0.16$  Å for AL and  $0.58 \pm 0.15$  Å for NV (Supplementary  
342 Figure 10). AUC of the modified hit selection procedure (when applied to all 200 generated dock  
343 poses) was 0.89 for AL and 0.9 for AV (Figure 6B), highlighting that the peptide binding pose inside  
344 the DtpB binding pocket can be predicted with high confidence. Furthermore, the RMSD for the  
345 peptide side-chains after superposition (rmsSC see Materials & Methods) was  $1.45 \pm 0.07$  Å for AL

346 and  $1.25 \pm 0.24$  Å for NV, suggesting that the conformation of the peptide can be predicted with good  
347 precision.

348 To test whether the classifier between binder and non-binder peptides (see DtpB preferentially binds  
349 small hydrophobic peptides) can correctly predict binders, we experimentally measured the binding  
350 affinity of twelve commercially available peptides that were not used to train the classifier  
351 (Supplementary Table 3). Of those, five peptides (AH, AY, GD, LLA, RGD) had binder probabilities  
352 above 0.5 (predicted binders) and seven peptides (EA, GPE, HH, PY, SH, YA, YYR) had binder  
353 probabilities in the range of 0 - 0.1 (predicted non-binders). Five out of seven non-binders were true  
354 negatives (experimental  $K_D$  over 1 mM), and two predicted non-binders (PY and SH) turned out to  
355 be false negatives with  $K_D$  values of  $206 \pm 126$  and  $352 \pm 38$   $\mu$ M. In case of predicted binders, three  
356 out of five (AH, AY, LLA) were true positives (experimental  $K_D$  below 1 mM). Two of the false-  
357 positives among predicted binders (RGD and GD) were in the ‘ambiguous’ probability region (Figure  
358 5B) with binder probabilities of only 0.52 and 0.6 (indicating low confidence of the prediction). The  
359 ROC AUC of the experimental validation of the classifier is 0.74, i.e. the discrimination capability of  
360 our classification approach is acceptable, yet there is room for improvement.

361 Finally, we asked whether selection of peptides using binder probability could exclude the peptides  
362 that are known to be transported (see Tight peptide binding is not associated with transport). As  
363 demonstrated in Figure 6C, only three out of twelve peptides transported by DtpB have low binder  
364 probability (predicted non-binders). Two peptides, including the reference substrate AA, are in the  
365 ‘ambiguous’ probability region, so they are unlikely to be discovered with the proposed workflow,  
366 however, the remaining seven known substrates can be potentially identified starting from the docking  
367 analysis.

368

## 369 **Conclusions**

370 In this work we present one of the most comprehensive structural and functional characterizations of  
371 a POT to date. We established a high-throughput crystallization pipeline, and determined the  
372 structures of 14 complexes of DtpB with ten different dipeptides and four tripeptides. Flexible  
373 residues within the binding site and multiple stabilizing polar interactions with peptides carrying  
374 various chemical groups were identified. Combined with a comprehensive biochemical  
375 characterization, these insights allowed us to quantify the binding probability of the whole di- and  
376 tripeptide space of proteinogenic amino acids and pin-point the key properties of a strong binder: high  
377 hydrophobicity and moderate size of the side-chain in the first position of the peptide.

378 A common assumption in biochemical studies of transporter proteins is that strong binders are also  
379 well transported<sup>72</sup>. For instance, it was recently demonstrated for three transporters from the MFS,  
380 amino acid-polyamine-organocation (APC) and mitochondrial carrier (MCS) superfamily, that  
381 stabilizing compounds identified by thermal unfolding assays are also well transported in follow-up  
382 radioactive measurements<sup>72</sup>. In case of DtpB, however, the trend is different, and only mid-affinity  
383 peptides ( $K_D$  between 100  $\mu$ M and 2.5 mM) are well transported in a reconstituted system. We  
384 speculate that this could be a general feature of promiscuous transporters as opposed to highly specific  
385 transporters. We also note that transport assays are technically more demanding, so development of  
386 high-throughput and robust approaches would help advance our understanding of the mechanisms of  
387 transport and their relationship with binding. On the other hand, a combination of *in silico* predictions  
388 followed up by selection of potential interactors using a high-throughput assay can effectively narrow  
389 down the number of candidates to be tested in a low-throughput transport assay. In case of DtpB,  
390 applying such a funnel reduces the list of all possible di- and tripeptides ( $n = 8400$ ) to a few hundreds  
391 of candidates that can be tested for binding by thermal unfolding assays or other techniques. Next,  
392 selected peptides in the medium affinity range can be tested for transport using liposome-based assays  
393 (pyranine assay or radioactive uptake measurement) ultimately identifying new peptide substrates for  
394 DtpB and potentially other promiscuous peptide transporters, including the clinically-relevant human  
395 PepT1 and PepT2 transporters. A critical step in this application would be to explore the moiety of  
396 the putative ligand that can mimic the N-terminus of a di- or tripeptide and be used for the initial  
397 placement of the ligand in the binding pocket. In this work we used a peptide-specific docking  
398 protocol, however, a scoring function for small molecules is available in Rosetta<sup>73</sup> thus significantly  
399 extending the scope of molecules that can be characterized *in silico*.

400 Our findings also indicate that high affinity peptides believed to be taken up by PepT1 in the human  
401 gut, could in fact act as inhibitors, justifying their use as attractive therapies in inflammatory bowel  
402 disease (IBD) and colonic cancer<sup>74-79</sup>. Overall, this work provides a solid molecular and biochemical  
403 basis for understanding how structural plasticity of POT's binding site allows for uptake of a large  
404 diversity of ligands. This constitutes a major step forward towards actual structure-based drug design  
405 approaches aiming at inhibiting these transport shuttle systems, or at hijacking them to increase drug  
406 absorption.

407

## 408 **Acknowledgements**

409 We thank the Sample Preparation and Characterization facility of EMBL Hamburg for support in this  
410 project and the beamlines P13 and P14 at EMBL Hamburg for regular access. We acknowledge Rolf

411 Nielsen for initial NanoDSF characterization of DtpB and Instruct-ERIC and the FWO for their  
412 support to the Nb discovery and Nele Buys for the technical assistance during nanobody discovery.  
413 Funding for the automated crystallography pipelines at EMBL Grenoble was provided by the grants  
414 iNEXT (g.n. 653706) and iNEXT Discovery (g.n. 871037) projects funded by the Horizon 2020  
415 program of the European Commission and through Instruct-ERIC. All past and current members of  
416 the Löw group are acknowledged for their input to this manuscript. This research was supported  
417 through the Maxwell computational resources operated at Deutsches Elektronen-Synchrotron  
418 (DESY), Hamburg, Germany. VK and KJ were supported by a research fellowship from the EMBL  
419 Interdisciplinary Postdoc (EIPOD) Programme under Marie Curie Cofund Actions MSCA-  
420 COFUND-FP (grant agreement number 847543). The authors thank Ulrike Uhrig (EMBL ChemBio  
421 facility) for useful discussions on molecular docking.

## 422 **Author contributions**

423 Conceptualization: CL, MK, KJ, VK

424 Investigation: all authors

425 Software: VK

426 Writing – Original Draft: VK, CL, MK, KJ

427 Writing – Review & Editing: all authors

428 Visualization: VK, MK, KJ

429 Supervision: CL, MK, KJ, JAM, JS

430 Funding acquisition: CL, JAM, JS

431

## 432 **Competing interests**

433 The authors declare no competing financial interests

434

## 435 **Data availability statement**

436 The structures of the DtpB-peptide complexes were deposited to PDB with the following accession  
437 codes: 8B18, 8B19, 8B1A, 8B1B, 8B1C, 8B1D, 8B1E, 8B1F, 8B1G, 8B17, 8B1H, 8B1I, 8B1K,  
438 8B1J. Data and code for the pyranine assay, thermal unfolding assay and docking-based prediction of

439 binder probability were deposited to Zenodo with record ID's 7612027, 7611944, 7612000, and  
440 7586704.

441

442

443

444

445

446

447

448

449

450

451

452

453

454

455

456

457

458

459

460

461

462

463

464

465

466

## 467 Figures

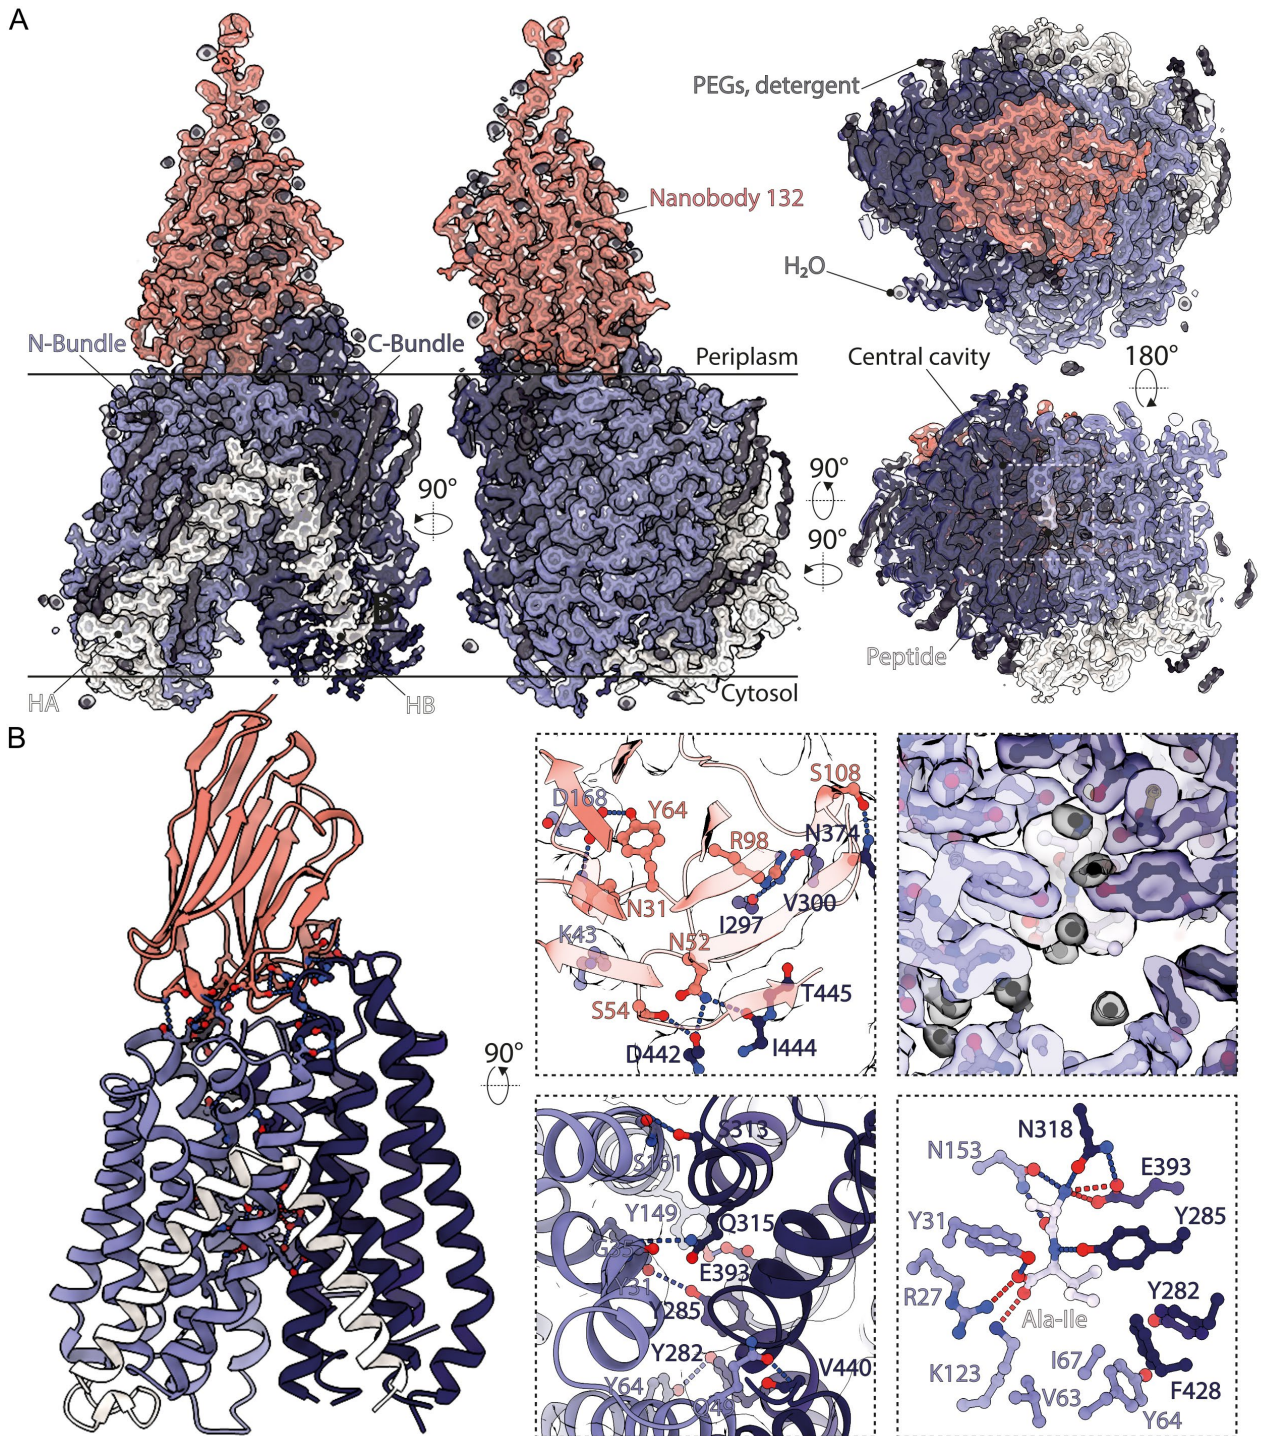

468

469 **Figure 1: Structure of DtpB bound to nanobody Nb132 and the dipeptide AI.** (A) The atomic  
470 model of DtpB-Nb132 fitted from the highest resolution dataset AI. The 2Fo-Fc map is shown as  
471 transparent surface (at  $\sigma = 1$ ). The different structural elements are labeled. (B) Residues stabilizing  
472 the observed conformation are displayed as ball and sticks and the secondary structural elements are



473 shown as ribbons. Interactions between the transporter and the nanobody are shown in the top left  
474 close up view, while interactions stabilizing the IF state between both bundles are highlighted in the  
475 bottom panel. The electron density at the binding site and the dipeptide are illustrated in the top right  
476 close up view, and the electrostatic interactions between the peptide and DtpB are shown as dashes  
477 in the bottom panel (red dashed lines denote salt bridges; blue dashed lines correspond to polar  
478 interactions; waters are shown in black).

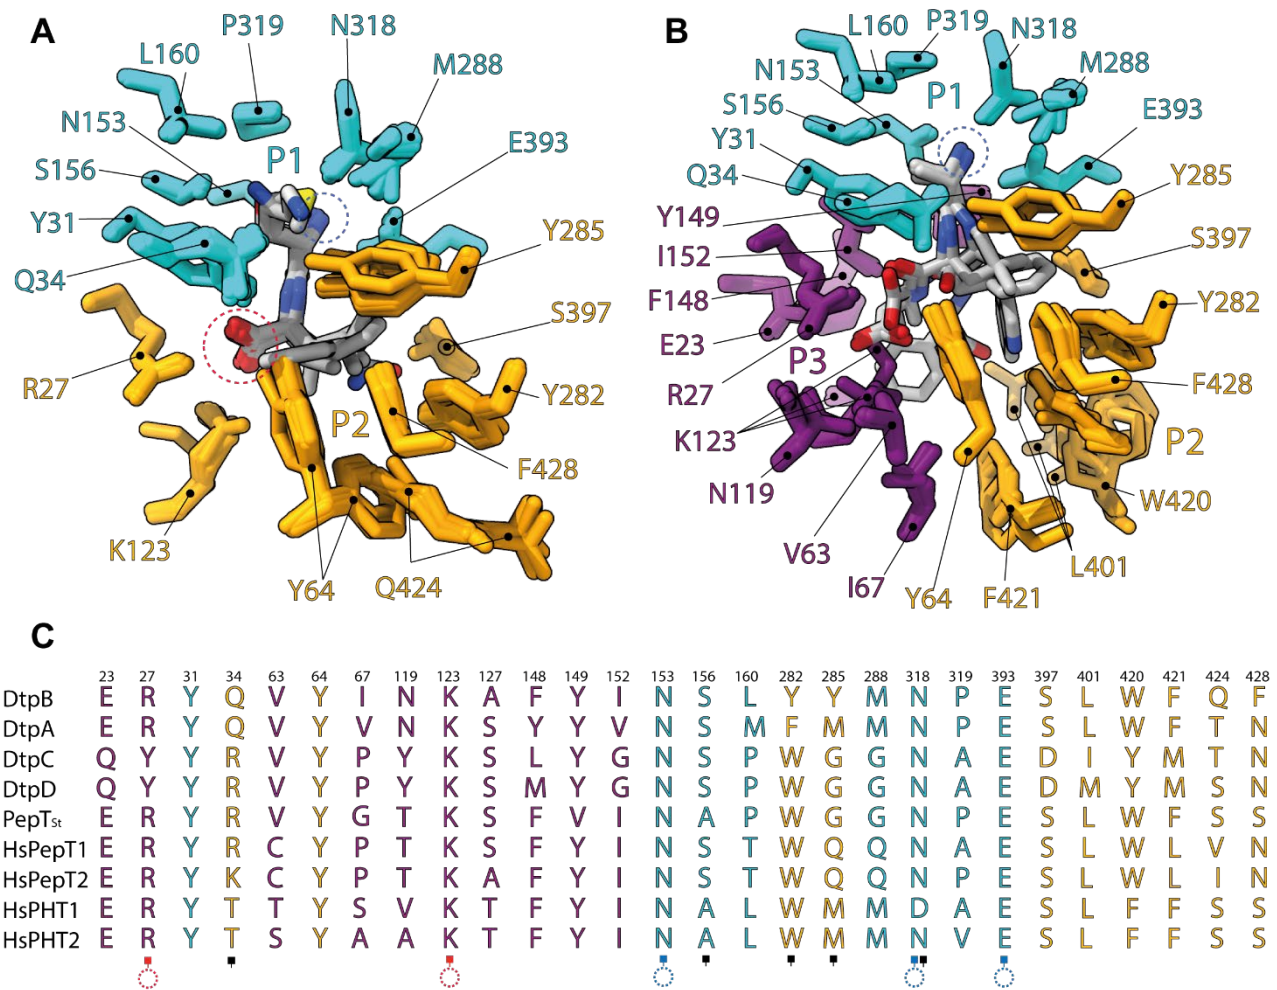

479

480 **Figure 2: Definition of the binding pocket of DtpB.** (A) Superimposition of the dipeptide co-crystal  
 481 structures. (B) Superimposition of the tripeptide co-crystal structures. (C) Sequence alignment of the  
 482 residues constituting the P1, P2, and P3 pockets in POTs. Residues constituting the P1, P2, and P3  
 483 pockets are respectively colored in cyan, yellow, and purple. Blue and red dashed rings circle the N-  
 484 termini, and the C-termini. Blue and red squares indicate residues mediating electrostatic interactions  
 485 with the termini of the co-crystallized peptides. Black squares indicate residues mediating polar  
 486 interactions with the side chains of co-crystallized peptides. The N-termini are all coordinated in the  
 487 same manner, while the C-termini adopt different positions in tripeptides.

488

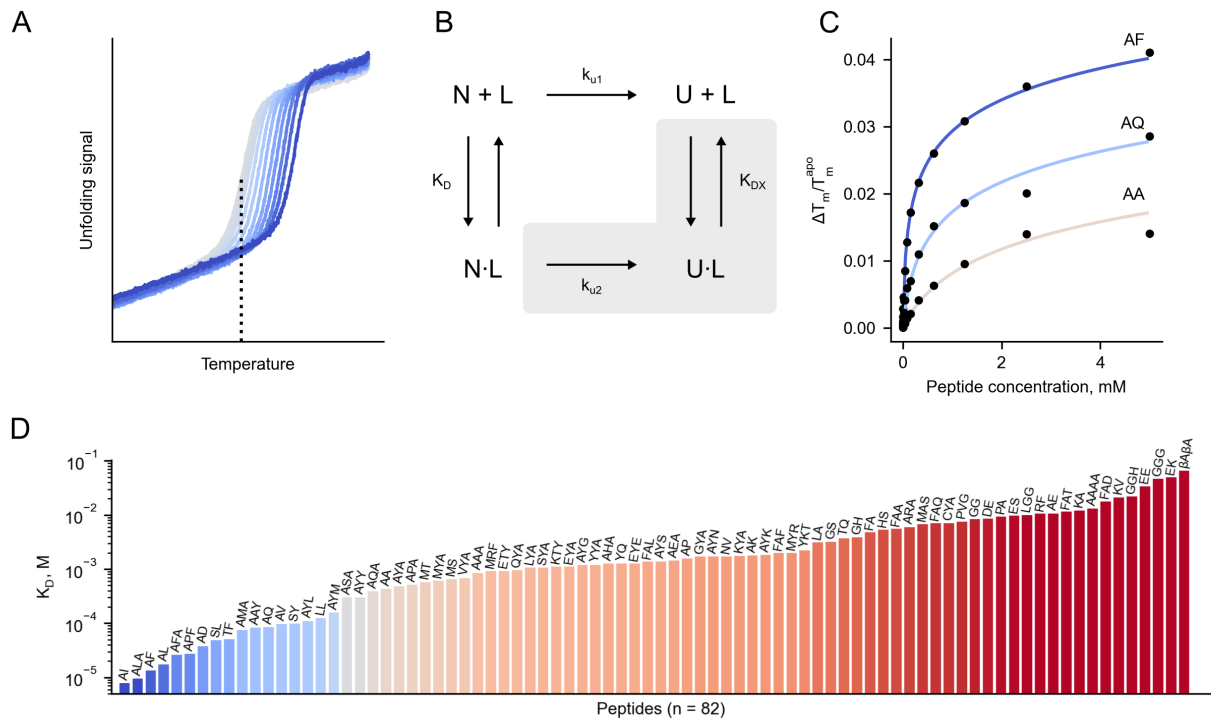

489

490 **Figure 3: Large-scale determination of peptide binding to DtpB using a thermal unfolding**  
 491 **assay.** (A) Thermal unfolding assays can quantify protein-ligand interactions; ligand concentration  
 492 increases with the blue color intensity. Melting temperature ( $T_m$ ) of the apo state (gray curves) is  
 493 shown with a vertical dashed line. (B) Hall's irreversible unfolding model to describe receptor-ligand  
 494 interaction in a thermal unfolding assay. N - native state of the receptor, U - unfolded state of the  
 495 receptor, L - ligand. Elements under the gray area denote the part of the model that was omitted in the  
 496 current study. (C) Exemplary saturation curves of diverse peptides. Peptide affinity is color-coded  
 497 with AF having the highest affinity, and AA having the lowest affinity.  $T_m^{\text{apo}}$  is the melting  
 498 temperature of the apo state,  $\Delta T_m$  is the difference in  $T_m$  between the apo state and in presence of  
 499 respective peptide concentration. (D) Overview of  $K_D$  values obtained in this study; the affinity is  
 500 color-coded with low-affinity peptides in red and high-affinity peptides in blue.

501

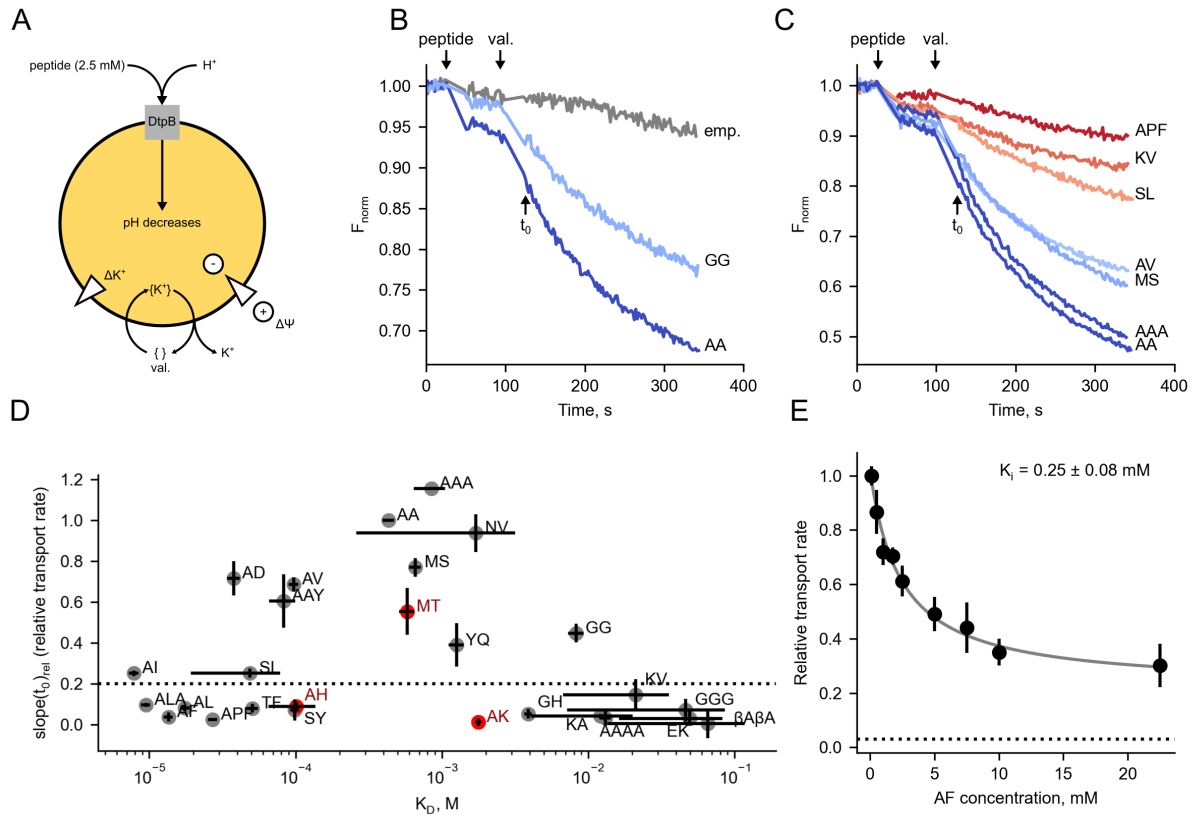

502

503 **Figure 4: Measurement of peptide transport by DtpB and its relationship with peptide  $K_D$ .** (A)  
 504 The principle of the pyranine assay. DtpB is reconstituted into liposomes, and a concentration gradient  
 505 of potassium ions ( $\Delta K^+$ ) from the inside to the outside of the liposome is created. Upon addition of  
 506 valinomycin (val.) the potassium ions are chelated ( $\{K^+\}$ ) and carried across the membrane and  
 507 establish an electrochemical gradient (membrane potential  $\Delta\Psi$ ). The membrane becomes  
 508 hyperpolarized, and DtpB can utilize this gradient for proton-coupled peptide transport (peptide is  
 509 added at indicated concentration to the outside buffer only). Proton flux into the liposome changes  
 510 the fluorescence spectrum of the membrane-impermeable dye pyranine (yellow) present inside the  
 511 liposome. (B) Exemplary transport curves of AA and GG detected with the pyranine assay. The  
 512 transport signal from liposomes without DtpB (emp.) is shown in gray. Upper arrows denote  
 513 approximate time when the peptide or valinomycin (val.) were added. Addition of peptide and  
 514 valinomycin requires the fluorescence reading to be paused. Another arrow indicates  $t_0$ , which  
 515 corresponds to the time point when the fluorescence readings are resumed. (C) Exemplary transport  
 516 curves of diverse peptides tested in this work with pyranine assay. Approximate time when the peptide  
 517 or valinomycin (val.) were added is shown with arrows. The curves are color-coded to show slow or  
 518 no transport in red, and fast transport in blue. (D) Relationship between binding ( $K_D$ ) and  $slope(t_0)_{rel}$   
 519 (relative initial transport rate in pyranine assay). Dashed horizontal line indicates a cut-off of 0.20,

520 which corresponds to 20% of slope( $t_0$ ) of AA. Only peptides above the dashed line are considered to  
521 be transported. Peptides marked in red were predicted to be transported based on their  $K_D$  and  
522 subsequently tested in the pyranine assay. Error bars for  $K_D$  are standard deviations ( $n = 2$ ). Error bars  
523 for transport rate are the median absolute deviation ( $n = 2$ ). (E) AF inhibits transport of AA. Relative  
524 transport rates of AA in presence of variable AF concentrations are shown as black dots, and the fit  
525 curve into Hill equation to determine  $IC_{50}$  is shown in grey. Error bars correspond to the standard  
526 deviation ( $n = 3$ ). The relative transport rate of AF alone is shown with a dashed line.  
527

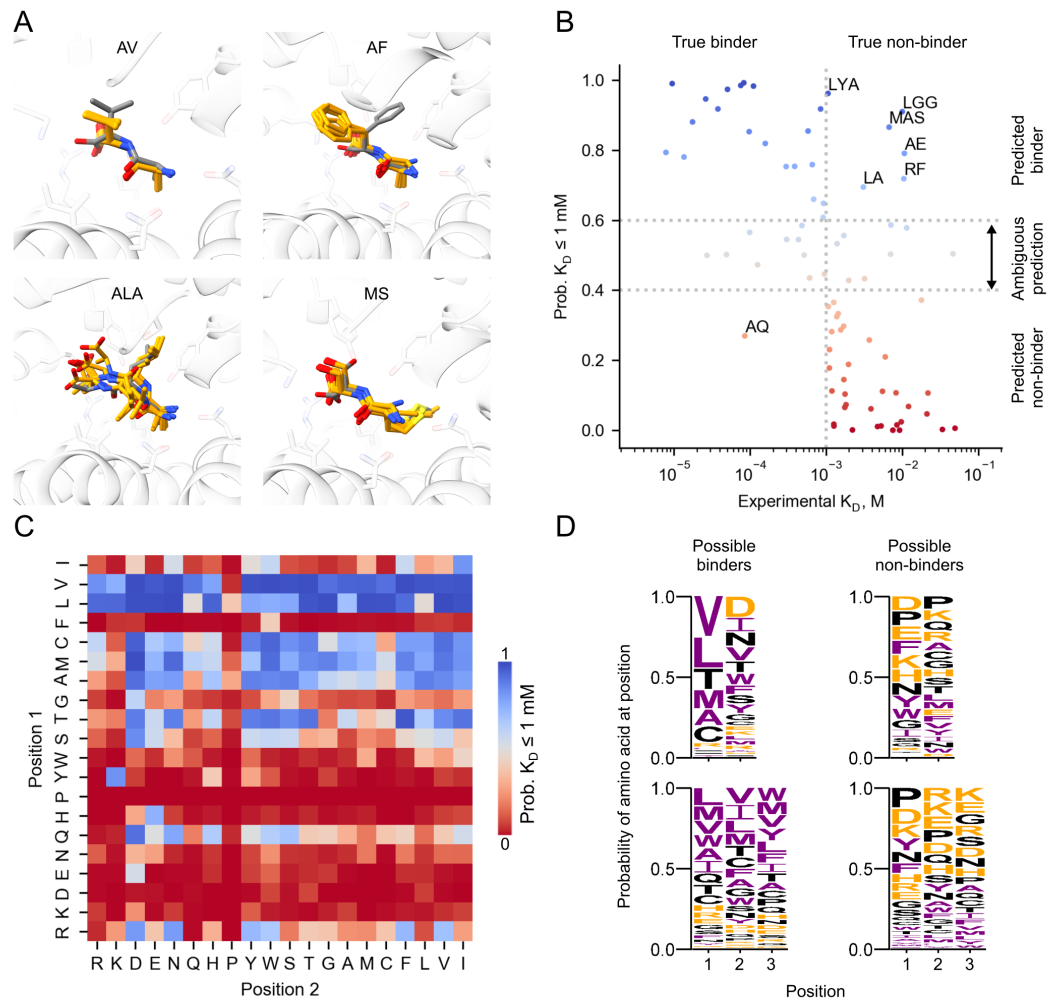

528

529 **Figure 5: Flexible docking of di- and tripeptides into DtpB.** (A) Exemplary docking results. The  
 530 binding pocket is viewed from the cytoplasmic side, and only the native structure of DtpB is shown.  
 531 The native conformation of the peptide is shown in gray, and top ten docked models are shown in  
 532 orange. For all 14 peptides with known experimental structures see SupFigure 10. (B)  
 533 Characterization of the logistic regression classifier that predicts binding of a peptide to DtpB.  
 534 Vertical dashed line shows the value of experimental  $K_D$  that is used to divide peptides into two  
 535 classes: binders ( $K_D \leq 1$  mM) and non-binders ( $K_D > 1$  mM). Horizontal dashed lines correspond to  
 536 the cut-off values for probabilities reported by the logistic regression classifier: if the binder  
 537 probability is below 0.4, then it is very likely that the peptide will not bind to DtpB. On the other  
 538 hand, with binder probabilities above 0.6 an interaction with DtpB is to be expected, however, it  
 539 cannot be excluded that the peptide will still exhibit low affinity. In the probability range between 0.4  
 540 and 0.6 it is difficult to assign a peptide to any class ('ambiguous' prediction). Data points are colored  
 541 by their binder probability (see color map in panel C). Labeled data points correspond to false-  
 542 positives (top right quadrant) and false-negatives (lower left quadrant). (C) Influence of the amino

543 acid identity on the probability of a dipeptide to be a DtpB binder. Amino acids in columns and rows  
544 are ordered by Kyte-Doolittle hydrophobicity scale<sup>80</sup> with most hydrophobic residues in the top right  
545 corner. Note that in the Kyte-Doolittle scale W and Y are considered amphiphilic amino acids, so their  
546 hydrophobicity is close to 0. (D) Sequence logos (consensus sequence representation) for dipeptides  
547 (top row) and tripeptides (bottom row) categorized by their probability to be a binder. Hydrophobic  
548 residues are shown in purple, charged residues are colored orange.

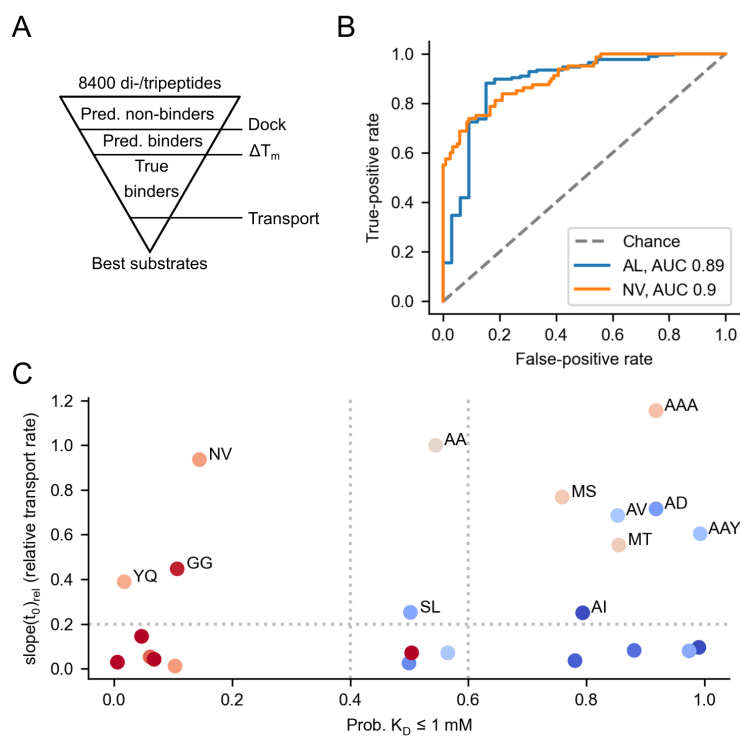

549

550 **Figure 6: Characterization of the workflow to discover new peptide substrates for DtpB.** (A)

551 Schematic diagram of the proposed workflow. First, all possible di- and tripeptides (n=8400)

552 composed of proteinogenic amino acids are separated into predicted binders and non-binders based

553 on the docking results. This step is virtually instant, because the computation has already been

554 performed. Second, true binders are identified using high-throughput  $K_D$  estimation based on thermal

555 shifts ( $\Delta T_m$ ). Finally, selected peptides in the optimal  $K_D$  range for transport (between  $\sim 100$   $\mu$ M and

556  $\sim 2.5$  mM) are tested for transport using the low-throughput pyranine assay to identify true substrates.

557 (B) ROC for the prediction of peptide docking poses for AL and NV. (C) Peptides transported by

558 DtpB tend to have high binder probability. The shown data points are color-coded according to

559 affinity: high affinity (i.e. low  $K_D$ ) in blue and low affinity (i.e. high  $K_D$ ) in red. Only peptides above

560 the horizontal dashed line are considered transported. Vertical dashed lines indicate the ‘ambiguous

561 probability’ region, i.e. where the binder/non-binder nature of the peptide is predicted with low

562 confidence.

563

564

565



566 **Movie 1: Structural plasticity of the binding pocket of DtpB.** Structural overlay of the 14 different  
567 DtpB-peptide complexes. Coordinating residues of the DtpB binding site are shown in sticks (light-  
568 and dark-blue for residues of the N- and C-bundle). Peptides are illustrated in sticks and colored  
569 white. Initially, a morph of ten DtpB structures bound to dipeptides is presented, but only the dipeptide  
570 backbone (white) and coordinating backbone residues of the binding pocket are shown. This is  
571 followed by a morph of the DtpB structures bound to tripeptides. Only minor structural changes on  
572 the peptide backbone and coordinating residues of the transporter can be observed. This is followed  
573 by a morph of all 14 structures and all residues of the binding pocket involved in peptide coordination  
574 (including side-chains) are highlighted in light- and dark-blue sticks. The bound peptides are omitted  
575 for clarity and the structural plasticity of the binding pocket is visualized. The binding pocket of DtpB  
576 can adapt to the different side chains of the peptide, while the coordination of the peptide backbone  
577 remains constant.

578

579

580

581

582 **Tables**583 *Table 1: Data collection and refinement statistics of DtpB-Nb132-peptide datasets*

| Peptide<br>PDB code                              | AF<br>8B18                    | AFA<br>8B19                   | AI<br>8B1A                    | AL<br>8B1B                    | ALA<br>8B1C                   | APF<br>8B1D                   | AQ<br>8B1E                    | AV<br>8B1F                    | AW<br>8B1G                    | AWA<br>8B17                   | KV<br>8B1H                    | MS<br>8B1I                    | NV<br>8B1K                    | SL<br>8B1J                    |
|--------------------------------------------------|-------------------------------|-------------------------------|-------------------------------|-------------------------------|-------------------------------|-------------------------------|-------------------------------|-------------------------------|-------------------------------|-------------------------------|-------------------------------|-------------------------------|-------------------------------|-------------------------------|
| Resolution (Å)                                   | 49.90 - 2.30<br>(2.38 - 2.30) | 70.30 - 2.45<br>(2.55 - 2.45) | 51.69 - 2.15<br>(2.23 - 2.15) | 51.95 - 2.80<br>(2.90 - 2.80) | 51.79 - 2.56<br>(2.65 - 2.56) | 62.58 - 2.30<br>(2.38 - 2.30) | 58.74 - 2.47<br>(2.56 - 2.47) | 84.47 - 2.35<br>(2.43 - 2.35) | 59.16 - 2.50<br>(2.59 - 2.50) | 58.76 - 2.50<br>(2.59 - 2.50) | 69.95 - 2.60<br>(2.69 - 2.60) | 50.95 - 2.55<br>(2.64 - 2.55) | 54.14 - 2.80<br>(2.90 - 2.80) | 51.16 - 2.67<br>(2.77 - 2.67) |
| Space group                                      | P 2 21 21                     | P 2 21 21                     | P 2 21 21                     | P 2 21 21                     | P 2 21 21                     | P 2 21 21                     | P 2 21 21                     | P 2 21 21                     | P 2 21 21                     | P 2 21 21                     | P 2 21 21                     | P 2 21 21                     | P 2 21 21                     | P 2 21 21                     |
| Cell dimensions<br>a, b, c (Å)                   | 54.42, 125.07,<br>168.71      | 54.70, 125.51,<br>169.72      | 54.32, 125.74,<br>168.00      | 54.59, 125.84,<br>169.03      | 54.40, 123.54,<br>169.33      | 54.76, 125.16,<br>169.90      | 54.47, 125.39,<br>168.18      | 54.65, 126.17,<br>168.94      | 54.61, 126.41,<br>168.04      | 54.60, 125.36,<br>168.82      | 54.34, 125.71,<br>168.37      | 54.18, 124.68,<br>167.46      | 54.14, 124.93,<br>165.77      | 54.49, 125.66,<br>168.04      |
| $\alpha, \beta, \gamma$ (°)                      | 90, 90, 90                    | 90, 90, 90                    | 90, 90, 90                    | 90, 90, 90                    | 90, 90, 90                    | 90, 90, 90                    | 90, 90, 90                    | 90, 90, 90                    | 90, 90, 90                    | 90, 90, 90                    | 90, 90, 90                    | 90, 90, 90                    | 90, 90, 90                    | 90, 90, 90                    |
| Total No. of reflections                         | 667300<br>(64221)             | 578325<br>(55600)             | 810303<br>(71235)             | 378285<br>(38108)             | 75320 (7396)                  | 105697<br>(10434)             | 83033 (8176)                  | 649577<br>(45053)             | 81675 (7972)                  | 80967 (8074)                  | 72749 (7106)                  | 75797 (7414)                  | 57042 (5622)                  | 65106 (5161)                  |
| No. of reflections                               | 52149 (5144)                  | 43863 (4296)                  | 63584 (6245)                  | 29527 (2894)                  | 37673 (3699)                  | 52854 (5217)                  | 42145 (4129)                  | 49598 (4863)                  | 40878 (4000)                  | 40497 (4037)                  | 36376 (3553)                  | 37899 (3707)                  | 28523 (2811)                  | 32661 (2628)                  |
| Completeness (%)                                 | 99.93 (99.94)                 | 99.90 (99.95)                 | 99.94 (99.94)                 | 99.88 (100.00)                | 99.89 (99.78)                 | 99.93 (99.96)                 | 99.71 (99.61)                 | 99.88 (99.94)                 | 99.15 (98.62)                 | 98.65 (100.00)                | 99.92 (100.00)                | 99.92 (99.95)                 | 99.77 (99.93)                 | 96.74 (77.81)                 |
| <i>I</i> / $\sigma$ <i>I</i>                     | 16.79 (1.47)                  | 16.45 (1.40)                  | 18.87 (1.48)                  | 16.30 (1.57)                  | 16.74 (1.89)                  | 13.91 (1.24)                  | 14.56 (1.82)                  | 15.18 (0.78)                  | 12.36 (1.05)                  | 14.29 (1.43)                  | 13.06 (1.04)                  | 9.44 (1.30)                   | 12.01 (0.88)                  | 12.66 (1.19)                  |
| Wilson B-factor (Å <sup>2</sup> )                | 53.52                         | 71.01                         | 50.5                          | 80.22                         | 66.52                         | 57.56                         | 61.28                         | 59.41                         | 69.68                         | 69.65                         | 71.69                         | 54.22                         | 77.16                         | 80.58                         |
| <i>R</i> <sub>merge</sub>                        | 0.08998<br>(1.649)            | 0.09384<br>(2.310)            | 0.07757<br>(1.664)            | 0.13730<br>(2.112)            | 0.02248<br>(0.4068)           | 0.02381<br>(0.5902)           | 0.02899<br>(0.4735)           | 0.11130<br>(3.0180)           | 0.01985<br>(0.6883)           | 0.02077<br>(0.4964)           | 0.02634<br>(0.6764)           | 0.04223<br>(0.5812)           | 0.03269<br>(0.8924)           | 0.02147<br>(0.675)            |
| <i>R</i> <sub>meas</sub>                         | 0.09399<br>(1.719)            | 0.09789<br>(2.405)            | 0.08102<br>(1.742)            | 0.14350<br>(2.198)            | 0.03179<br>(0.5752)           | 0.03368<br>(0.8347)           | 0.0410<br>(0.6697)            | 0.11610<br>(3.199)            | 0.02807<br>(0.9734)           | 0.02937<br>(0.702)            | 0.03725<br>(0.9565)           | 0.05973<br>(0.822)            | 0.04623<br>(1.262)            | 0.03037<br>(0.9545)           |
| <i>R</i> <sub>pin</sub>                          | 0.02673<br>(0.4834)           | 0.02738<br>(0.6643)           | 0.02302<br>(0.5110)           | 0.04087<br>(0.6025)           | 0.02248<br>(0.4068)           | 0.02381<br>(0.5902)           | 0.02899<br>(0.4735)           | 0.03238<br>(1.0420)           | 0.01985<br>(0.6883)           | 0.02077<br>(0.4964)           | 0.02634<br>(0.6764)           | 0.04223<br>(0.5812)           | 0.03269<br>(0.8924)           | 0.02147<br>(0.6750)           |
| CC1/2                                            | 0.999 (0.648)                 | 0.999 (0.522)                 | 0.999 (0.591)                 | 0.997 (0.531)                 | 0.999 (0.694)                 | 1 (0.609)                     | 0.998 (0.640)                 | 0.991 (0.285)                 | 1 (0.432)                     | 1 (0.643)                     | 1 (0.488)                     | 1 (0.545)                     | 1 (0.367)                     | 1 (0.350)                     |
| CC* <sup>a</sup>                                 | 1 (0.887)                     | 1 (0.828)                     | 1 (0.862)                     | 0.999 (0.833)                 | 1 (0.905)                     | 1 (0.870)                     | 1 (0.883)                     | 0.998 (0.666)                 | 1 (0.777)                     | 1 (0.885)                     | 1 (0.810)                     | 1 (0.840)                     | 1 (0.733)                     | 1 (0.720)                     |
| Reflections used in refinement                   | 52127 (5142)                  | 43856 (4295)                  | 63564 (6244)                  | 29508 (2894)                  | 37667 (3699)                  | 52830 (5216)                  | 42133 (4122)                  | 49579 (4862)                  | 40846 (3993)                  | 40479 (4037)                  | 36360 (3553)                  | 37882 (3705)                  | 28489 (2809)                  | 32590 (2577)                  |
| Reflections used for<br><i>R</i> <sub>free</sub> | 2589 (251)                    | 2223 (236)                    | 3113 (316)                    | 2999 (306)                    | 1892 (188)                    | 2648 (249)                    | 2078 (213)                    | 2514 (252)                    | 2015 (191)                    | 2000 (193)                    | 1807 (180)                    | 1838 (200)                    | 1382 (128)                    | 1621 (122)                    |
| <i>R</i> <sub>work</sub>                         | 0.2267<br>(0.3774)            | 0.2241<br>(0.3115)            | 0.2154<br>(0.3490)            | 0.2254<br>(0.3354)            | 0.2151<br>(0.2944)            | 0.2299<br>(0.3515)            | 0.2221<br>(0.3108)            | 0.2164<br>(0.2998)            | 0.2245<br>(0.3442)            | 0.2314<br>(0.3054)            | 0.2257<br>(0.3659)            | 0.2241<br>(0.3319)            | 0.2260<br>(0.3869)            | 0.2211<br>(0.3589)            |
| <i>R</i> <sub>free</sub>                         | 0.2536<br>(0.4101)            | 0.2673<br>(0.3354)            | 0.2390<br>(0.3854)            | 0.2633<br>(0.3708)            | 0.2410<br>(0.3293)            | 0.2575<br>(0.3866)            | 0.2669<br>(0.3498)            | 0.2363<br>(0.3244)            | 0.2481<br>(0.3548)            | 0.2647<br>(0.3278)            | 0.2602<br>(0.3766)            | 0.2574<br>(0.3686)            | 0.2503<br>(0.4129)            | 0.2636<br>(0.3964)            |
| Number of non-hydrogen atoms                     | 4718                          | 4793                          | 4787                          | 4669                          | 4781                          | 4792                          | 4786                          | 4785                          | 4786                          | 4791                          | 4787                          | 4784                          | 4789                          | 4787                          |
| Protein residues                                 | 580                           | 581                           | 580                           | 580                           | 581                           | 581                           | 580                           | 580                           | 580                           | 581                           | 580                           | 580                           | 580                           | 580                           |
| R.m.s. deviations                                |                               |                               |                               |                               |                               |                               |                               |                               |                               |                               |                               |                               |                               |                               |
| Bond lengths (Å)                                 | 0.011                         | 0.011                         | 0.01                          | 0.012                         | 0.012                         | 0.01                          | 0.011                         | 0.01                          | 0.01                          | 0.012                         | 0.012                         | 0.011                         | 0.013                         | 0.01                          |
| R.m.s. deviations                                |                               |                               |                               |                               |                               |                               |                               |                               |                               |                               |                               |                               |                               |                               |
| Angles (°)                                       | 1.32                          | 1.3                           | 1.08                          | 1.44                          | 1.45                          | 1.32                          | 1.32                          | 1.1                           | 1.32                          | 1.32                          | 1.37                          | 1.3                           | 1.56                          | 1.19                          |
| Ramachandran favored (%)                         | 98.42                         | 97.72                         | 98.06                         | 96.83                         | 98.42                         | 98.42                         | 98.42                         | 98.06                         | 98.06                         | 97.54                         | 97.89                         | 97.18                         | 97.89                         | 97.36                         |
| Ramachandran allowed (%)                         | 1.41                          | 2.11                          | 1.94                          | 3.17                          | 1.58                          | 1.58                          | 1.58                          | 1.94                          | 1.94                          | 2.46                          | 2.11                          | 2.82                          | 1.94                          | 2.64                          |
| Ramachandran outliers (%)                        | 0.18                          | 0.18                          | 0                             | 0                             | 0                             | 0                             | 0                             | 0                             | 0                             | 0                             | 0                             | 0                             | 0.18                          | 0                             |
| Rotamer outliers (%)                             | 0.42                          | 1.06                          | 1.06                          | 1.91                          | 0.64                          | 0.64                          | 0.64                          | 1.06                          | 1.7                           | 0.85                          | 0.64                          | 0.85                          | 0.64                          | 1.06                          |
| Clashscore                                       | 10.1                          | 10.09                         | 8.1                           | 10.94                         | 10.3                          | 8.61                          | 7.05                          | 7.57                          | 9.15                          | 9.24                          | 9.46                          | 9.15                          | 11.36                         | 10.83                         |
| Average B-factor                                 | 67.63                         | 80.49                         | 60                            | 82.94                         | 75.22                         | 67.08                         | 64.85                         | 67.4                          | 77.25                         | 75.84                         | 75.99                         | 61.75                         | 82.31                         | 81.74                         |

584

585 Statistics for the highest-resolution shell are shown in parentheses.

## 586 References

587

- 588 1. Reitzer, L. (2003). Nitrogen assimilation and global regulation in *Escherichia coli*. *Annu*  
589 *Rev Microbiol* *57*, 155-176. [10.1146/annurev.micro.57.030502.090820](https://doi.org/10.1146/annurev.micro.57.030502.090820).
- 590 2. Daniel, H., Spanier, B., Kottra, G., and Weitz, D. (2006). From bacteria to man: archaic  
591 proton-dependent peptide transporters at work. *Physiology (Bethesda)* *21*, 93-102.  
592 [10.1152/physiol.00054.2005](https://doi.org/10.1152/physiol.00054.2005).
- 593 3. Doki, S., Kato, H.E., Solcan, N., Iwaki, M., Koyama, M., Hattori, M., Iwase, N., Tsukazaki,  
594 T., Sugita, Y., Kandori, H., et al. (2013). Structural basis for dynamic mechanism of proton-  
595 coupled symport by the peptide transporter POT. *Proc Natl Acad Sci U S A* *110*, 11343-  
596 11348. [10.1073/pnas.1301079110](https://doi.org/10.1073/pnas.1301079110).
- 597 4. Guettou, F., Quistgaard, E.M., Tresaugues, L., Moberg, P., Jegerschold, C., Zhu, L., Jong,  
598 A.J., Nordlund, P., and Low, C. (2013). Structural insights into substrate recognition in  
599 proton-dependent oligopeptide transporters. *EMBO Rep* *14*, 804-810.  
600 [10.1038/embo.2013.107](https://doi.org/10.1038/embo.2013.107).
- 601 5. Lyons, J.A., Parker, J.L., Solcan, N., Brinth, A., Li, D., Shah, S.T., Caffrey, M., and  
602 Newstead, S. (2014). Structural basis for polyspecificity in the POT family of proton-  
603 coupled oligopeptide transporters. *EMBO Rep* *15*, 886-893. [10.15252/embr.201338403](https://doi.org/10.15252/embr.201338403).
- 604 6. Newstead, S., Drew, D., Cameron, A.D., Postis, V.L., Xia, X., Fowler, P.W., Ingram, J.C.,  
605 Carpenter, E.P., Sansom, M.S., McPherson, M.J., et al. (2011). Crystal structure of a  
606 prokaryotic homologue of the mammalian oligopeptide-proton symporters, PepT1 and  
607 PepT2. *EMBO J* *30*, 417-426. [10.1038/emboj.2010.309](https://doi.org/10.1038/emboj.2010.309).
- 608 7. Ural-Blimke, Y., Flayhan, A., Strauss, J., Rantos, V., Bartels, K., Nielsen, R., Pardon, E.,  
609 Steyaert, J., Kosinski, J., Quistgaard, E.M., and Low, C. (2019). Structure of Prototypic  
610 Peptide Transporter DtpA from *E. coli* in Complex with Valganciclovir Provides Insights  
611 into Drug Binding of Human PepT1. *J Am Chem Soc* *141*, 2404-2412.  
612 [10.1021/jacs.8b11343](https://doi.org/10.1021/jacs.8b11343).
- 613 8. Zhao, Y., Mao, G., Liu, M., Zhang, L., Wang, X., and Zhang, X.C. (2014). Crystal structure  
614 of the *E. coli* peptide transporter YbgH. *Structure* *22*, 1152-1160. [10.1016/j.str.2014.06.008](https://doi.org/10.1016/j.str.2014.06.008).
- 615 9. Jardetzky, O. (1966). Simple allosteric model for membrane pumps. *Nature* *211*, 969-970.  
616 [10.1038/211969a0](https://doi.org/10.1038/211969a0).
- 617 10. Solcan, N., Kwok, J., Fowler, P.W., Cameron, A.D., Drew, D., Iwata, S., and Newstead, S.  
618 (2012). Alternating access mechanism in the POT family of oligopeptide transporters.  
619 *EMBO J* *31*, 3411-3421. [10.1038/emboj.2012.157](https://doi.org/10.1038/emboj.2012.157).
- 620 11. Bartels, K., Lasitza-Male, T., Hofmann, H., and Low, C. (2021). Single-Molecule FRET of  
621 Membrane Transport Proteins. *ChemBiochem* *22*, 2657-2671. [10.1002/cbic.202100106](https://doi.org/10.1002/cbic.202100106).
- 622 12. Drew, D., North, R.A., Nagarathinam, K., and Tanabe, M. (2021). Structures and General  
623 Transport Mechanisms by the Major Facilitator Superfamily (MFS). *Chem Rev* *121*, 5289-  
624 5335. [10.1021/acs.chemrev.0c00983](https://doi.org/10.1021/acs.chemrev.0c00983).
- 625 13. Quistgaard, E.M., Low, C., Guettou, F., and Nordlund, P. (2016). Understanding transport by  
626 the major facilitator superfamily (MFS): structures pave the way. *Nat Rev Mol Cell Biol* *17*,  
627 123-132. [10.1038/nrm.2015.25](https://doi.org/10.1038/nrm.2015.25).
- 628 14. Newstead, S. (2017). Recent advances in understanding proton coupled peptide transport via  
629 the POT family. *Curr Opin Struct Biol* *45*, 17-24. [10.1016/j.sbi.2016.10.018](https://doi.org/10.1016/j.sbi.2016.10.018).
- 630 15. Goh, E.B., Siino, D.F., and Igo, M.M. (2004). The *Escherichia coli* tppB (ydgR) gene  
631 represents a new class of OmpR-regulated genes. *J Bacteriol* *186*, 4019-4024.  
632 [10.1128/JB.186.12.4019-4024.2004](https://doi.org/10.1128/JB.186.12.4019-4024.2004).

- 633 16. Harder, D., Stolz, J., Casagrande, F., Obrdlik, P., Weitz, D., Fotiadis, D., and Daniel, H.  
634 (2008). DtpB (YhiP) and DtpA (TppB, YdgR) are prototypical proton-dependent peptide  
635 transporters of *Escherichia coli*. *FEBS J* 275, 3290-3298. 10.1111/j.1742-  
636 4658.2008.06477.x.
- 637 17. Meredith, D., and Boyd, C.A. (2000). Structure and function of eukaryotic peptide  
638 transporters. *Cell Mol Life Sci* 57, 754-778. 10.1007/s000180050040.
- 639 18. Killer, M., Finocchio, G., Mertens, H.D.T., Svergun, D.I., Pardon, E., Steyaert, J., and Low,  
640 C. (2022). Cryo-EM Structure of an Atypical Proton-Coupled Peptide Transporter: Di- and  
641 Tripeptide Permease C. *Front Mol Biosci* 9, 917725. 10.3389/fmolb.2022.917725.
- 642 19. Chen, X.Z., Steel, A., and Hediger, M.A. (2000). Functional roles of histidine and tyrosine  
643 residues in the H(+)-peptide transporter PepT1. *Biochem Biophys Res Commun* 272, 726-  
644 730. 10.1006/bbrc.2000.2851.
- 645 20. Foley, D.W., Rajamanickam, J., Bailey, P.D., and Meredith, D. (2010). Bioavailability  
646 through PepT1: the role of computer modelling in intelligent drug design. *Curr Comput*  
647 *Aided Drug Des* 6, 68-78. 10.2174/157340910790980133.
- 648 21. Prabhala, B.K., Aduri, N.G., Iqbal, M., Rahman, M., Gajhede, M., Hansen, P.R., and Mirza,  
649 O. (2017). Several hPepT1-transported drugs are substrates of the *Escherichia coli* proton-  
650 coupled oligopeptide transporter YdgR. *Res Microbiol* 168, 443-449.  
651 10.1016/j.resmic.2017.01.005.
- 652 22. Prabhala, B.K., Aduri, N.G., Jensen, J.M., Ernst, H.A., Iram, N., Rahman, M., and Mirza, O.  
653 (2014). New insights into the substrate specificities of proton-coupled oligopeptide  
654 transporters from *E. coli* by a pH sensitive assay. *FEBS Lett* 588, 560-565.  
655 10.1016/j.febslet.2014.01.004.
- 656 23. Smith, M.W., Tyreman, D.R., Payne, G.M., Marshall, N.J., and Payne, J.W. (1999).  
657 Substrate specificity of the periplasmic dipeptide-binding protein from *Escherichia coli*:  
658 experimental basis for the design of peptide prodrugs. *Microbiology (Reading)* 145 ( Pt 10),  
659 2891-2901. 10.1099/00221287-145-10-2891.
- 660 24. Weitz, D., Harder, D., Casagrande, F., Fotiadis, D., Obrdlik, P., Kelety, B., and Daniel, H.  
661 (2007). Functional and structural characterization of a prokaryotic peptide transporter with  
662 features similar to mammalian PEPT1. *J Biol Chem* 282, 2832-2839.  
663 10.1074/jbc.M604866200.
- 664 25. Aduri, N.G., Prabhala, B.K., Ernst, H.A., Jorgensen, F.S., Olsen, L., and Mirza, O. (2015).  
665 Salt Bridge Swapping in the EXXERFXYY Motif of Proton-coupled Oligopeptide  
666 Transporters. *J Biol Chem* 290, 29931-29940. 10.1074/jbc.M115.675603.
- 667 26. Ernst, H.A., Pham, A., Hald, H., Kastrup, J.S., Rahman, M., and Mirza, O. (2009). Ligand  
668 binding analyses of the putative peptide transporter YjdL from *E. coli* display a significant  
669 selectivity towards dipeptides. *Biochem Biophys Res Commun* 389, 112-116.  
670 10.1016/j.bbrc.2009.08.098.
- 671 27. Jensen, J.M., Aduri, N.G., Prabhala, B.K., Jahnsen, R., Franzyk, H., and Mirza, O. (2014).  
672 Critical role of a conserved transmembrane lysine in substrate recognition by the proton-  
673 coupled oligopeptide transporter YjdL. *Int J Biochem Cell Biol* 55, 311-317.  
674 10.1016/j.biocel.2014.09.016.
- 675 28. Jensen, J.M., Ernst, H., Wang, X., Hald, H., Ditta, A.C., Ismat, F., Rahman, M., and Mirza,  
676 O. (2012). Functional investigation of conserved membrane-embedded glutamate residues in  
677 the proton-coupled peptide transporter YjdL. *Protein Pept Lett* 19, 282-287.  
678 10.2174/092986612799363109.
- 679 29. Jensen, J.M., Ismat, F., Szakonyi, G., Rahman, M., and Mirza, O. (2012). Probing the  
680 putative active site of YjdL: an unusual proton-coupled oligopeptide transporter from *E.*  
681 *coli*. *PLoS One* 7, e47780. 10.1371/journal.pone.0047780.

- 682 30. Jensen, J.M., Simonsen, F.C., Mastali, A., Hald, H., Lillebro, I., Diness, F., Olsen, L., and  
683 Mirza, O. (2012). Biophysical characterization of the proton-coupled oligopeptide  
684 transporter YjdL. *Peptides* 38, 89-93. 10.1016/j.peptides.2012.08.012.
- 685 31. Killer, M., Wald, J., Pieprzyk, J., Marlovits, T.C., and Low, C. (2021). Structural snapshots  
686 of human PepT1 and PepT2 reveal mechanistic insights into substrate and drug transport  
687 across epithelial membranes. *Sci Adv* 7, eabk3259. 10.1126/sciadv.abk3259.
- 688 32. Martinez Molledo, M., Quistgaard, E.M., Flayhan, A., Pieprzyk, J., and Low, C. (2018).  
689 Multispecific Substrate Recognition in a Proton-Dependent Oligopeptide Transporter.  
690 *Structure* 26, 467-476 e464. 10.1016/j.str.2018.01.005.
- 691 33. Martinez Molledo, M., Quistgaard, E.M., and Low, C. (2018). Tripeptide binding in a  
692 proton-dependent oligopeptide transporter. *FEBS Lett* 592, 3239-3247. 10.1002/1873-  
693 3468.13246.
- 694 34. Minhas, G.S., Bawdon, D., Herman, R., Rudden, M., Stone, A.P., James, A.G., Thomas,  
695 G.H., and Newstead, S. (2018). Structural basis of malodour precursor transport in the  
696 human axilla. *Elife* 7. 10.7554/eLife.34995.
- 697 35. Nagamura, R., Fukuda, M., Kawamoto, A., Matoba, K., Dohmae, N., Ishitani, R., Takagi, J.,  
698 and Nureki, O. (2019). Structural basis for oligomerization of the prokaryotic peptide  
699 transporter PepT(So2). *Acta Crystallogr F Struct Biol Commun* 75, 348-358.  
700 10.1107/S2053230X19003546.
- 701 36. Parker, J.L., Deme, J.C., Wu, Z., Kuteyi, G., Huo, J., Owens, R.J., Biggin, P.C., Lea, S.M.,  
702 and Newstead, S. (2021). Cryo-EM structure of PepT2 reveals structural basis for proton-  
703 coupled peptide and prodrug transport in mammals. *Sci Adv* 7. 10.1126/sciadv.abh3355.
- 704 37. Quistgaard, E.M., Martinez Molledo, M., and Low, C. (2017). Structure determination of a  
705 major facilitator peptide transporter: Inward facing PepTSt from *Streptococcus thermophilus*  
706 crystallized in space group P3121. *PLoS One* 12, e0173126. 10.1371/journal.pone.0173126.
- 707 38. Shen, J., Hu, M., Fan, X., Ren, Z., Portioli, C., Yan, X., Rong, M., and Zhou, M. (2022).  
708 Extracellular domain of PepT1 interacts with TM1 to facilitate substrate transport. *Structure*  
709 30, 1035-1041 e1033. 10.1016/j.str.2022.04.011.
- 710 39. Stauffer, M., Jeckelmann, J.M., Ilgu, H., Ucurum, Z., Boggavarapu, R., and Fotiadis, D.  
711 (2022). Peptide transporter structure reveals binding and action mechanism of a potent  
712 PEPT1 and PEPT2 inhibitor. *Commun Chem* 5, 23. 10.1038/s42004-022-00636-0.
- 713 40. Boggavarapu, R., Jeckelmann, J.M., Harder, D., Ucurum, Z., and Fotiadis, D. (2015). Role  
714 of electrostatic interactions for ligand recognition and specificity of peptide transporters.  
715 *BMC Biol* 13, 58. 10.1186/s12915-015-0167-8.
- 716 41. Guettou, F., Quistgaard, E.M., Raba, M., Moberg, P., Low, C., and Nordlund, P. (2014).  
717 Selectivity mechanism of a bacterial homolog of the human drug-peptide transporters PepT1  
718 and PepT2. *Nat Struct Mol Biol* 21, 728-731. 10.1038/nsmb.2860.
- 719 42. Pardon, E., Laeremans, T., Triest, S., Rasmussen, S.G., Wohlkonig, A., Ruf, A.,  
720 Muyldermans, S., Hol, W.G., Kobilka, B.K., and Steyaert, J. (2014). A general protocol for  
721 the generation of Nanobodies for structural biology. *Nat Protoc* 9, 674-693.  
722 10.1038/nprot.2014.039.
- 723 43. Cornaciu, I., Bourgeas, R., Hoffmann, G., Dupeux, F., Humm, A.S., Mariaule, V., Pica, A.,  
724 Clavel, D., Seroul, G., Murphy, P., and Marquez, J.A. (2021). The Automated  
725 Crystallography Pipelines at the EMBL HTX Facility in Grenoble. *J Vis Exp*.  
726 10.3791/62491.
- 727 44. Zander, U., Hoffmann, G., Cornaciu, I., Marquette, J.P., Papp, G., Landret, C., Seroul, G.,  
728 Sinoir, J., Rower, M., Felisaz, F., et al. (2016). Automated harvesting and processing of  
729 protein crystals through laser photoablation. *Acta Crystallogr D Struct Biol* 72, 454-466.  
730 10.1107/S2059798316000954.

- 731 45. Biegel, A., Gebauer, S., Brandsch, M., Neubert, K., and Thondorf, I. (2006). Structural  
732 requirements for the substrates of the H<sup>+</sup>/peptide cotransporter PEPT2 determined by three-  
733 dimensional quantitative structure-activity relationship analysis. *J Med Chem* *49*, 4286-  
734 4296. 10.1021/jm0601811.
- 735 46. Brandsch, M. (2013). Drug transport via the intestinal peptide transporter PepT1. *Curr Opin*  
736 *Pharmacol* *13*, 881-887. 10.1016/j.coph.2013.08.004.
- 737 47. Boivin, S., Kozak, S., and Meijers, R. (2013). Optimization of protein purification and  
738 characterization using ThermoFluor screens. *Protein Expr Purif* *91*, 192-206.  
739 10.1016/j.pep.2013.08.002.
- 740 48. Chari, A., Haselbach, D., Kirves, J.M., Ohmer, J., Paknia, E., Fischer, N., Ganichkin, O.,  
741 Moller, V., Frye, J.J., Petzold, G., et al. (2015). ProteoPlex: stability optimization of  
742 macromolecular complexes by sparse-matrix screening of chemical space. *Nat Methods* *12*,  
743 859-865. 10.1038/nmeth.3493.
- 744 49. Pantoliano, M.W., Petrella, E.C., Kwasnoski, J.D., Lobanov, V.S., Myslik, J., Graf, E.,  
745 Carver, T., Asel, E., Springer, B.A., Lane, P., and Salemme, F.R. (2001). High-density  
746 miniaturized thermal shift assays as a general strategy for drug discovery. *J Biomol Screen*  
747 *6*, 429-440. 10.1177/108705710100600609.
- 748 50. Vedadi, M., Arrowsmith, C.H., Allali-Hassani, A., Senisterra, G., and Wasney, G.A. (2010).  
749 Biophysical characterization of recombinant proteins: a key to higher structural genomics  
750 success. *J Struct Biol* *172*, 107-119. 10.1016/j.jsb.2010.05.005.
- 751 51. Bai, N., Roder, H., Dickson, A., and Karanicolas, J. (2019). Isothermal Analysis of  
752 ThermoFluor Data can readily provide Quantitative Binding Affinities. *Sci Rep* *9*, 2650.  
753 10.1038/s41598-018-37072-x.
- 754 52. Layton, C.J., and Hellinga, H.W. (2010). Thermodynamic analysis of ligand-induced  
755 changes in protein thermal unfolding applied to high-throughput determination of ligand  
756 affinities with extrinsic fluorescent dyes. *Biochemistry* *49*, 10831-10841.  
757 10.1021/bi101414z.
- 758 53. Lepock, J.R., Ritchie, K.P., Kolios, M.C., Rodahl, A.M., Heinz, K.A., and Kruuv, J. (1992).  
759 Influence of transition rates and scan rate on kinetic simulations of differential scanning  
760 calorimetry profiles of reversible and irreversible protein denaturation. *Biochemistry* *31*,  
761 12706-12712. 10.1021/bi00165a023.
- 762 54. Sanchez-Ruiz, J.M. (1992). Theoretical analysis of Lumry-Eyring models in differential  
763 scanning calorimetry. *Biophys J* *61*, 921-935. 10.1016/S0006-3495(92)81899-4.
- 764 55. Hall, J. (2019). A simple model for determining affinity from irreversible thermal shifts.  
765 *Protein Sci* *28*, 1880-1887. 10.1002/pro.3701.
- 766 56. Jarmoskaite, I., AlSadhan, I., Vaidyanathan, P.P., and Herschlag, D. (2020). How to measure  
767 and evaluate binding affinities. *Elife* *9*. 10.7554/eLife.57264.
- 768 57. Fei, Y.J., Kanai, Y., Nussberger, S., Ganapathy, V., Leibach, F.H., Romero, M.F., Singh,  
769 S.K., Boron, W.F., and Hediger, M.A. (1994). Expression cloning of a mammalian proton-  
770 coupled oligopeptide transporter. *Nature* *368*, 563-566. 10.1038/368563a0.
- 771 58. Ganapathy, V., and Leibach, F.H. (1986). Carrier-mediated reabsorption of small peptides in  
772 renal proximal tubule. *Am J Physiol* *251*, F945-953. 10.1152/ajprenal.1986.251.6.F945.
- 773 59. Li, C., Yue, Z., Newstead, S., and Voth, G.A. (2022). Proton coupling and the multiscale  
774 kinetic mechanism of a peptide transporter. *Biophys J* *121*, 2266-2278.  
775 10.1016/j.bpj.2022.05.029.
- 776 60. Kano, K., and Fendler, J.H. (1978). Pyranine as a sensitive pH probe for liposome interiors  
777 and surfaces. pH gradients across phospholipid vesicles. *Biochim Biophys Acta* *509*, 289-  
778 299. 10.1016/0005-2736(78)90048-2.
- 779 61. Parker, J.L., Mindell, J.A., and Newstead, S. (2014). Thermodynamic evidence for a dual  
780 transport mechanism in a POT peptide transporter. *Elife* *3*. 10.7554/eLife.04273.

- 781 62. Seifert, K., Fendler, K., and Bamberg, E. (1993). Charge transport by ion translocating  
782 membrane proteins on solid supported membranes. *Biophys J* *64*, 384-391. 10.1016/S0006-  
783 3495(93)81379-1.
- 784 63. Raveh, B., London, N., and Schueler-Furman, O. (2010). Sub-angstrom modeling of  
785 complexes between flexible peptides and globular proteins. *Proteins* *78*, 2029-2040.  
786 10.1002/prot.22716.
- 787 64. Alford, R.F., Leaver-Fay, A., Jeliazkov, J.R., O'Meara, M.J., DiMaio, F.P., Park, H.,  
788 Shapovalov, M.V., Renfrew, P.D., Mulligan, V.K., Kappel, K., et al. (2017). The Rosetta All-  
789 Atom Energy Function for Macromolecular Modeling and Design. *J Chem Theory Comput*  
790 *13*, 3031-3048. 10.1021/acs.jctc.7b00125.
- 791 65. Bender, B.J., Gahbauer, S., Luttsens, A., Lyu, J., Webb, C.M., Stein, R.M., Fink, E.A., Balius,  
792 T.E., Carlsson, J., Irwin, J.J., and Shoichet, B.K. (2021). A practical guide to large-scale  
793 docking. *Nat Protoc* *16*, 4799-4832. 10.1038/s41596-021-00597-z.
- 794 66. Mobley, D.L., and Dill, K.A. (2009). Binding of small-molecule ligands to proteins: "what  
795 you see" is not always "what you get". *Structure* *17*, 489-498. 10.1016/j.str.2009.02.010.
- 796 67. Bishop, C.M. (2006). Probabilistic Discriminative Models. In *Pattern Recognition and*  
797 *Machine Learning.*, p.209.
- 798 68. Klepsch, M.M., Kovermann, M., Low, C., Balbach, J., Permentier, H.P., Fusetti, F., de Gier,  
799 J.W., Slotboom, D.J., and Berntsson, R.P. (2011). *Escherichia coli* peptide binding protein  
800 OppA has a preference for positively charged peptides. *J Mol Biol* *414*, 75-85.  
801 10.1016/j.jmb.2011.09.043.
- 802 69. Zainol, M.K.M., Linforth, R.J.C., Winzor, D.J., and Scott, D.J. (2021). Thermodynamics of  
803 semi-specific ligand recognition: the binding of dipeptides to the *E.coli* dipeptide binding  
804 protein DppA. *Eur Biophys J* *50*, 1103-1110. 10.1007/s00249-021-01572-y.
- 805 70. Ito, K., Hikida, A., Kawai, S., Lan, V.T., Motoyama, T., Kitagawa, S., Yoshikawa, Y., Kato,  
806 R., and Kawarasaki, Y. (2013). Analysing the substrate multispecificity of a proton-coupled  
807 oligopeptide transporter using a dipeptide library. *Nat Commun* *4*, 2502.  
808 10.1038/ncomms3502.
- 809 71. Samsudin, F., Parker, J.L., Sansom, M.S.P., Newstead, S., and Fowler, P.W. (2016). Accurate  
810 Prediction of Ligand Affinities for a Proton-Dependent Oligopeptide Transporter. *Cell Chem*  
811 *Biol* *23*, 299-309. 10.1016/j.chembiol.2015.11.015.
- 812 72. Majd, H., King, M.S., Palmer, S.M., Smith, A.C., Elbourne, L.D., Paulsen, I.T., Sharples, D.,  
813 Henderson, P.J., and Kunji, E.R. (2018). Screening of candidate substrates and coupling ions  
814 of transporters by thermostability shift assays. *Elife* *7*. 10.7554/eLife.38821.
- 815 73. Park, H., Zhou, G., Baek, M., Baker, D., and DiMaio, F. (2021). Force Field Optimization  
816 Guided by Small Molecule Crystal Lattice Data Enables Consistent Sub-Angstrom Protein-  
817 Ligand Docking. *J Chem Theory Comput* *17*, 2000-2010. 10.1021/acs.jctc.0c01184.
- 818 74. Dalmaso, G., Charrier-Hisamuddin, L., Nguyen, H.T., Yan, Y., Sitaraman, S., and Merlin,  
819 D. (2008). PepT1-mediated tripeptide KPV uptake reduces intestinal inflammation.  
820 *Gastroenterology* *134*, 166-178. 10.1053/j.gastro.2007.10.026.
- 821 75. Ingersoll, S.A., Ayyadurai, S., Charania, M.A., Laroui, H., Yan, Y., and Merlin, D. (2012).  
822 The role and pathophysiological relevance of membrane transporter PepT1 in intestinal  
823 inflammation and inflammatory bowel disease. *Am J Physiol Gastrointest Liver Physiol*  
824 *302*, G484-492. 10.1152/ajpgi.00477.2011.
- 825 76. Kovacs-Nolan, J., Zhang, H., Ibuki, M., Nakamori, T., Yoshiura, K., Turner, P.V., Matsui, T.,  
826 and Mine, Y. (2012). The PepT1-transportable soy tripeptide VPY reduces intestinal  
827 inflammation. *Biochim Biophys Acta* *1820*, 1753-1763. 10.1016/j.bbagen.2012.07.007.
- 828 77. Miyake, M., Fujishima, M., and Nakai, D. (2017). Inhibitory Potency of Marketed Drugs for  
829 Ulcerative Colitis and Crohn's Disease on PEPT1. *Biol Pharm Bull* *40*, 1572-1575.  
830 10.1248/bpb.b17-00181.

- 831 78. Viennois, E., Pujada, A., Zen, J., and Merlin, D. (2018). Function, Regulation, and  
832 Pathophysiological Relevance of the POT Superfamily, Specifically PepT1 in Inflammatory  
833 Bowel Disease. *Compr Physiol* 8, 731-760. 10.1002/cphy.c170032.
- 834 79. Zhu, W., Ren, L., Zhang, L., Qiao, Q., Farooq, M.Z., and Xu, Q. (2020). The Potential of  
835 Food Protein-Derived Bioactive Peptides against Chronic Intestinal Inflammation.  
836 *Mediators Inflamm* 2020, 6817156. 10.1155/2020/6817156.
- 837 80. Kyte, J., and Doolittle, R.F. (1982). A simple method for displaying the hydrophobic  
838 character of a protein. *J Mol Biol* 157, 105-132. 10.1016/0022-2836(82)90515-0.  
839
